# Supplementary material for: Phylogenomics and adaptive evolution of hydrophytic umbellifers (tribe Oenantheae, Apioideae) revealed from chloroplast genomes
Source: PubMed Central journal article supplement — BMC Plant Biol. 2024 Nov 28;24:1140. doi: 10.1186/s12870-024-05863-2 (PMC11603818; doi:10.1186/s12870-024-05863-2), 2024-11-28

# Phylogenomics and adaptive evolution of hydrophytic umbellifers (tribe Oenantheae, Apiioideae) revealed from chloroplast genomes

Jun Wen<sup>1</sup>, Jun-Wen Zhu<sup>1</sup>, Xu-Dong Ma<sup>1</sup>, Hui-Min Li<sup>1</sup>, Bao-Cheng Wu<sup>1</sup>, Wei Zhou<sup>1</sup>,  
Jia-Xin Yang<sup>2</sup>, Chun-Feng Song<sup>1,\*</sup>

\*Correspondence: Chun-Feng Song [cfsong79@cnbg.net](mailto:cfsong79@cnbg.net)

<sup>1</sup> Jiangsu Key Laboratory for the Research and Utilization of Plant Resources,  
Institute of Botany, Jiangsu Province and Chinese Academy of Sciences (Nanjing  
Botanical Garden Mem. Sun Yat-Sen), Nanjing, China, 210014

<sup>2</sup> Huaiyin Institute of Technology, School of Life Science and Food Engineering,  
Huaian, China, 223000

## Abstract:

**Background:** Tribe Oenantheae consists mainly of aquatic species within the Apiioideae. The unique morphology and habitat distinguish this group from other Apiioideae groups. However, the genomic information of these group species has not been widely developed, and the molecular mechanisms of adaptive evolution remain unclear.

**Results:** We provide comparative analyses on 30 chloroplast genomes of this tribe representing five genera to explore the molecular variation response to plant adaptations. The Oenantheae chloroplast genomes presented typical quadripartite structures, with sizes ranging from 153,024 bp to 155,006 bp. Gene content and order were highly conserved with no significant expansion or contraction observed. Seven regions (*rps16* intron-*trnK*, *rpoB-trnC*, *trnE-trnT-psbD*, *petA-psbJ*, *ndhF-rpl32-trnL*, *ycf1a-rps15*, and *ycf1a* gene) were identified as remarkable candidate DNA markers for future studies on species identification, biogeography, and phylogeny of tribe Oenantheae. Our study elucidated the relationships among the genera of tribe Oenantheae and subdivided the genera of *Sium* and *Oenanthe*. However, relationships among the *Oenanthe* I clade remain to be further clarified. Eight positively selected genes (*accD*, *rbcL*, *rps8*, *ycf1a*, *ycf1b*, *ycf2*, *ndhF*, and *ndhK*) were persuasively detected under *site* models tests, and these genes might have played roles in Oenantheae species adaptation to the aquatic environments.

**Conclusions:** Our results provide sufficient molecular markers for the subsequent molecular studies of the tribe Oenantheae, and promote the understanding of the adaptation of the Oenantheae species to aquatic environments.

**Keywords:** Oenantheae, adaptation, phylogeny, positive selection, candidate DNA markers

**Table S1. Voucher information for species newly sequenced in this study.** NAS: Herbarium, Institute of Botany, Chinese Academy of Sciences, Jiangsu Province.

| Taxon                          | Collection number | Collector name                       | Locality                                                          | Latitude Longitude           | Altitude/m | Place of voucher deposition | Deposition number | Determiner |
|--------------------------------|-------------------|--------------------------------------|-------------------------------------------------------------------|------------------------------|------------|-----------------------------|-------------------|------------|
| <i>Cicuta virosa</i>           | LHM1252           | Hui-Min Li                           | Arele town, Qinghe County, Xinjiang Province, China               | N 46.860700,<br>E 90.312274  | 1351       | NAS                         | NAS00640404       | Jun Wen    |
| <i>Cicuta virosa</i>           | WJ2368            | Yong-Bo Yu                           | Jingyu County, Jiling Province, China                             | N 42.128859,<br>E 126.972341 | 828        | NAS                         | NAS00640405       | Jun Wen    |
| <i>Cryptotaenia canadensis</i> | WJ220908          | Jun Wen                              | Nanjing Botanical Garden Mem.Sun Yat-Sen, jiangsu Province, China | N 32.055262,<br>E 118.838222 | 47         | NAS                         | NAS00640406       | Jun Wen    |
| <i>Cryptotaenia japonica</i>   | WJ2375            | Xu-Dong Ma and Jun Wen               | Yuexi County, Anhui Province, China                               | N 30.987528,<br>E 116.095014 | 1119       | NAS                         | NAS00640407       | Jun Wen    |
| <i>Cryptotaenia japonica</i>   | WJ2384            | Jun Wen                              | Jinggang Mountain, Jiangxi Province, China                        | N 26.589113,<br>E 114.136933 | 921        | NAS                         | NAS00640408       | Jun Wen    |
| <i>Oenanthe hookeri</i>        | WJ2334            | Jun-Wen Zhu, Xu-Dong Ma, and Jun Wen | Shangri-la, Yunnan Province, China                                | N 27.372579,<br>E 100.126096 | 2791       | NAS                         | NAS00640409       | Jun Wen    |
| <i>Oenanthe javanica</i>       | WJ2305_02         | Jun-Wen Zhu, Xu-Dong Ma, and Jun Wen | Kunming, Yunnan Province, China                                   | N 25.140806,<br>E 102.740129 | 1989       | NAS                         | NAS00640410       | Jun Wen    |
| <i>Oenanthe javanica</i>       | WJ2320            | Jun-Wen Zhu, Xu-Dong Ma, and Jun Wen | Jingdong County, Yunnan Province, China                           | N 24.540939,<br>E 101.018529 | 2481       | NAS                         | NAS00640411       | Jun Wen    |
| <i>Oenanthe javanica</i>       | WJ2372_A<br>H01   | Xu-Dong Ma and Jun Wen               | Yuexi County, Anhui Province, China                               | N 31.010486,<br>E 116.174966 | 823        | NAS                         | NAS00640412       | Jun Wen    |

|                                                     |                   |                                      |                                                                   |                              |      |     |             |         |
|-----------------------------------------------------|-------------------|--------------------------------------|-------------------------------------------------------------------|------------------------------|------|-----|-------------|---------|
| <i>Oenanthe linearis</i>                            | ZJW034            | Jun-Wen Zhu, Xu-Dong Ma, and Jun Wen | Shangri-la, Yunnan Province, China                                | N 27.373053,<br>E 100.171049 | 2121 | NAS | NAS00640413 | Jun Wen |
| <i>Oenanthe linearis</i><br>subsp. <i>rivularis</i> | NZD2301           | Wei Zhou                             | Lancang County, Yunnan Province, China                            | N 22.576876,<br>E 100.273407 | 1135 | NAS | NAS00640414 | Jun Wen |
| <i>Oenanthe linearis</i><br>subsp. <i>rivularis</i> | WJ2319            | Jun-Wen Zhu, Xu-Dong Ma, and Jun Wen | Jingdong County, Yunnan Province, China                           | N 24.444515,<br>E 100.974998 | 1485 | NAS | NAS00640415 | Jun Wen |
| <i>Oenanthe thomsonii</i>                           | WJ2321            | Jun-Wen Zhu, Xu-Dong Ma, and Jun Wen | Jingdong County, Yunnan Province, China                           | N 24.540465,<br>E 101.017887 | 2474 | NAS | NAS00640416 | Jun Wen |
| <i>Oenanthe pimpinelloides</i>                      | wj2023060<br>7_01 | Jun Wen                              | Nanjing Botanical Garden Mem.Sun Yat-Sen, jiangsu Province, China | N 32.055262,<br>E 118.838222 | 47   | NAS | NAS00640417 | Jun Wen |
| <i>Sium serra</i>                                   | WJ2374            | Xudong Ma and Jun Wen                | Yuexi County, Anhui Province, China                               | N 30.987528,<br>E 116.095014 | 1119 | NAS | NAS00640418 | Jun Wen |
| <i>Sium suave</i>                                   | WBC2301           | Bao-Cheng Wu                         | China National Botanical Garden, Beijing, China                   | N 40.007561,<br>E 116.216186 | 81   | NAS | NAS00640419 | Jun Wen |
| <i>Sium ventricosum</i>                             | WJ2339            | Jun-Wen Zhu, Xu-Dong Ma, and Jun Wen | Shangri-la, Yunnan Province, China                                | N 27.760711,<br>E 99.939763  | 3471 | NAS | NAS00640420 | Jun Wen |

**Table S2. The junction positions of the four regions of Oenantheae chloroplast genomes.** JLA (IRA-LSCjunction); JLB (LSC-IRB junction); JSB (IRB-SSC junction); JSA (SSC-IRA junction).

| <b>Taxon</b>                                                    | <b>JLA</b>            | <b>JLB</b>         | <b>JSB</b>             | <b>JSA</b>   | <b>GenBank<br/>accession No.</b> |
|-----------------------------------------------------------------|-----------------------|--------------------|------------------------|--------------|----------------------------------|
| <b><i>Cicuta virosa</i> LHM1252</b>                             | <i>rpl2, trnH-GUG</i> | <i>rps19, rpl2</i> | <i>yef1</i>            | <i>yef1a</i> | <b>PQ283862</b>                  |
| <i>Cicuta virosa</i>                                            | <i>rpl2, trnH-GUG</i> | <i>rps19</i>       | <i>yef1 &amp; ndhF</i> | <i>yef1a</i> | NC_037711                        |
| <b><i>Cicuta virosa</i> WJ2368</b>                              | <i>rpl2, trnH-GUG</i> | <i>rps19</i>       | <i>yef1 &amp; ndhF</i> | <i>yef1a</i> | <b>PQ283863</b>                  |
| <b><i>Cryptotaenia canadensis</i></b>                           | <i>rpl2, trnH-GUG</i> | <i>rps19</i>       | <i>yef1 &amp; ndhF</i> | <i>yef1a</i> | <b>PQ283864</b>                  |
| <b><i>Cryptotaenia japonica</i> WJ2375</b>                      | <i>rpl2, trnH-GUG</i> | <i>rps19</i>       | <i>yef1 &amp; ndhF</i> | <i>yef1a</i> | <b>PQ283865</b>                  |
| <b><i>Cryptotaenia japonica</i> WJ2384</b>                      | <i>rpl2, trnH-GUG</i> | <i>rps19</i>       | <i>yef1 &amp; ndhF</i> | <i>yef1a</i> | <b>PQ283866</b>                  |
| <i>Cryptotaenia japonica</i>                                    | <i>rpl2, trnH-GUG</i> | <i>rps19</i>       | <i>yef1 &amp; ndhF</i> | <i>yef1a</i> | NC_046737                        |
| <b><i>Oenanthe hookeri</i></b>                                  | <i>rpl2, trnH-GUG</i> | <i>rps19</i>       | <i>yef1 &amp; ndhF</i> | <i>yef1a</i> | <b>PQ283867</b>                  |
| <i>Oenanthe javanica</i>                                        | <i>rpl2, trnH-GUG</i> | <i>rps19</i>       | <i>yef1 &amp; ndhF</i> | <i>yef1a</i> | NC_049874                        |
| <b><i>Oenanthe javanica</i> WJ2305_02</b>                       | <i>rpl2, trnH-GUG</i> | <i>rps19</i>       | <i>yef1 &amp; ndhF</i> | <i>yef1a</i> | <b>PQ283868</b>                  |
| <b><i>Oenanthe javanica</i> WJ2320</b>                          | <i>rpl2, trnH-GUG</i> | <i>rps19</i>       | <i>yef1</i>            | <i>yef1a</i> | <b>PQ283869</b>                  |
| <b><i>Oenanthe javanica</i> WJ2372_AH01</b>                     | <i>rpl2, trnH-GUG</i> | <i>rps19</i>       | <i>yef1 &amp; ndhF</i> | <i>yef1a</i> | <b>PQ283870</b>                  |
| <b><i>Oenanthe linearis</i> ZJW034</b>                          | <i>rpl2, trnH-GUG</i> | <i>rps19</i>       | <i>yef1 &amp; ndhF</i> | <i>yef1a</i> | <b>PQ283871</b>                  |
| <b><i>Oenanthe linearis</i> subsp. <i>rivularis</i> NZD2301</b> | <i>rpl2, trnH-GUG</i> | <i>rps19</i>       | <i>yef1 &amp; ndhF</i> | <i>yef1a</i> | <b>PQ283872</b>                  |
| <b><i>Oenanthe linearis</i> subsp. <i>rivularis</i> WJ2319</b>  | <i>rpl2, trnH-GUG</i> | <i>rps19</i>       | <i>yef1 &amp; ndhF</i> | <i>yef1a</i> | <b>PQ283873</b>                  |
| <b><i>Oenanthe thomsonii</i></b>                                | <i>rpl2, trnH-GUG</i> | <i>rps19</i>       | <i>yef1 &amp; ndhF</i> | <i>yef1a</i> | <b>PQ283875</b>                  |
| <i>Oenanthe virgata</i>                                         | <i>rpl2, trnH-GUG</i> | <i>rps19</i>       | <i>yef1 &amp; ndhF</i> | <i>yef1a</i> | KX832335                         |
| <b><i>Oenanthe pimpinelloides</i></b>                           | <i>rpl2, trnH-GUG</i> | <i>rps19</i>       | <i>yef1 &amp; ndhF</i> | <i>yef1a</i> | <b>PQ283874</b>                  |
| <i>Sium crispulifolium</i>                                      | <i>rpl2, trnH-GUG</i> | <i>rps19</i>       | <i>yef1 &amp; ndhF</i> | <i>yef1a</i> | OP234518                         |
| <i>Sium medium</i>                                              | <i>rpl2, trnH-GUG</i> | <i>rps19</i>       | <i>yef1 &amp; ndhF</i> | <i>yef1a</i> | NC_072108                        |
| <i>Sium ninsi</i>                                               | <i>rpl2, trnH-GUG</i> | <i>rps19</i>       | <i>yef1 &amp; ndhF</i> | <i>yef1a</i> | NC_072107                        |
| <b><i>Sium serra</i></b>                                        | <i>rpl2, trnH-GUG</i> | <i>rps19</i>       | <i>yef1 &amp; ndhF</i> | <i>yef1a</i> | <b>PQ283876</b>                  |

|                                                  |                       |              |                        |              |                 |
|--------------------------------------------------|-----------------------|--------------|------------------------|--------------|-----------------|
| <i>Sium suave</i>                                | <i>rpl2, trnH-GUG</i> | <i>rps19</i> | <i>ycf1 &amp; ndhF</i> | <i>ycf1a</i> | NC_071929       |
| <i>Sium suave</i>                                | <i>rpl2, trnH-GUG</i> | <i>rps19</i> | <i>ycf1 &amp; ndhF</i> | <i>ycf1a</i> | OP234519        |
| <b><i>Sium suave</i></b>                         | <i>rpl2, trnH-GUG</i> | <i>rps19</i> | <i>ycf1 &amp; ndhF</i> | <i>ycf1a</i> | <b>PQ283877</b> |
| <i>Sium tenue</i>                                | <i>rpl2, trnH-GUG</i> | <i>rps19</i> | <i>ycf1 &amp; ndhF</i> | <i>ycf1a</i> | NC_072106       |
| <i>Sium ventricosum</i>                          | <i>rpl2, trnH-GUG</i> | <i>rps19</i> | <i>ycf1</i>            | <i>ycf1a</i> | NC_070095       |
| <i>Sium ventricosum</i>                          | <i>rpl2, trnH-GUG</i> | <i>rps19</i> | <i>ycf1</i>            | <i>ycf1a</i> | OP234514        |
| <b><i>Sium ventricosum</i></b>                   | <i>rpl2, trnH-GUG</i> | <i>rps19</i> | <i>ycf1</i>            | <i>ycf1a</i> | <b>PQ283878</b> |
| <i>Tiedemannia filiformis subsp. greenmannii</i> | <i>rpl2, trnH-GUG</i> | <i>rps19</i> | <i>ycf1</i>            | <i>ycf1a</i> | HM596071        |

---

**Table S3. Nucleotide diversity (Pi) of the Oenanthaceae chloroplast genomes under a slide window calculated in DnaSP v6. Regions with Pi > 0.02 were listed and tagged with genetic information.**

| <b>Window</b> | <b>Midpoint</b> | <b>Pi</b> | <b>Sequence region</b>             |
|---------------|-----------------|-----------|------------------------------------|
| 1-774         | 474             | 0.01913   | <i>psbA-trnH</i>                   |
| 1375-2097     | 1699            | 0.01887   | <i>matK-psbA</i>                   |
| 1575-2297     | 1992            | 0.02371   | <i>matK-psbA</i>                   |
| 1800-2497     | 2197            | 0.02075   | <i>matK-psbA</i>                   |
| 2098-2697     | 2397            | 0.01757   | <i>matK</i>                        |
| 2298-2897     | 2597            | 0.01531   | <i>matK</i>                        |
| 2498-3097     | 2797            | 0.01516   | <i>matK</i>                        |
| 2698-3297     | 2997            | 0.01898   | <i>matK</i>                        |
| 2898-3510     | 3197            | 0.01744   | <i>matK</i>                        |
| 3098-3716     | 3397            | 0.02149   | <i>rps16-matK</i>                  |
| 3298-3917     | 3616            | 0.01553   | <i>rps16-matK</i>                  |
| 3511-4133     | 3816            | 0.01606   | <i>rps16-matK</i>                  |
| 3918-4586     | 4233            | 0.01825   | <i>rps16-matK</i>                  |
| 4134-5016     | 4457            | 0.02202   | <i>rps16-matK</i>                  |
| 4341-5274     | 4741            | 0.03063   | <i>rps16-trnK-UUU</i>              |
| 4587-5494     | 5164            | 0.02633   | <i>rps16-trnK-UUU</i>              |
| 5017-5711     | 5394            | 0.02525   | <i>rps16 intron-trnK-UUU</i>       |
| 5275-5950     | 5594            | 0.02064   | <i>rps16 intron-trnK-UUU</i>       |
| 5495-6151     | 5820            | 0.02043   | <i>rps16 intron</i>                |
| 5712-6378     | 6051            | 0.01714   | <i>rps16 intron</i>                |
| 6152-7876     | 6478            | 0.01631   | <i>rps16 intron-trnQ-UUG</i>       |
| 6379-8091     | 7762            | 0.02031   | <i>psbK-trnQ-UUG-rps16</i>         |
| 6595-8301     | 7984            | 0.02211   | <i>psbK-trnQ-UUG-rps16</i>         |
| 7877-8504     | 8201            | 0.01508   | <i>rps16 intron-trnUUG-psbK</i>    |
| 8302-8912     | 8604            | 0.01706   | <i>psbK-psbI</i>                   |
| 8505-9125     | 8812            | 0.02082   | <i>psbK-psbI-trnS-GCU</i>          |
| 8705-9332     | 9015            | 0.01867   | <i>psbK-psbI-trnS-GCU</i>          |
| 8913-9589     | 9232            | 0.02093   | <i>psbK-psbI-trnS-GCU-trnG-UCC</i> |
| 9126-9867     | 9488            | 0.02715   | <i>psbI-trnS-GCU-trnG-UCC</i>      |
| 9333-10083    | 9727            | 0.02596   | <i>trnS-GCU-trnG-UCC</i>           |
| 9590-10295    | 9967            | 0.02259   | <i>trnS-GCU-trnG-UCC</i>           |
| 9868-10522    | 10189           | 0.01766   | <i>trnG-UCC</i>                    |
| 10084-10743   | 10410           | 0.01732   | <i>trnG-UCC</i>                    |
| 10296-11127   | 10631           | 0.02137   | <i>trnG-UCC-trnR-UCU-atpA</i>      |
| 10523-11330   | 11011           | 0.01783   | <i>trnG-UCC-trnR-UCU-atpA</i>      |
| 10744-11530   | 11230           | 0.01588   | <i>trnG-UCC-trnR-UCU-atpA</i>      |
| 12938-13557   | 13237           | 0.01577   | <i>atpF intron</i>                 |
| 13138-13779   | 13450           | 0.01629   | <i>atpF intron</i>                 |
| 13338-14000   | 13679           | 0.01525   | <i>atpF intron</i>                 |
| 13780-14476   | 14100           | 0.02046   | <i>atpH-atpF intron</i>            |

|             |       |         |                                            |
|-------------|-------|---------|--------------------------------------------|
| 14001-14679 | 14373 | 0.0214  | <i>atpH-atpF</i>                           |
| 14255-14895 | 14579 | 0.02036 | <i>atpI-atpH-atpF</i>                      |
| 14680-15662 | 15022 | 0.02017 | <i>atpI-atpH</i>                           |
| 14896-15891 | 15381 | 0.02525 | <i>atpI-atpH</i>                           |
| 15145-16091 | 15762 | 0.01634 | <i>atpI-atpH</i>                           |
| 16292-17185 | 16591 | 0.01766 | <i>rps2-atpI</i>                           |
| 16492-17385 | 16823 | 0.01842 | <i>rps2-atpI</i>                           |
| 16692-17585 | 17285 | 0.01718 | <i>rps2-atpI</i>                           |
| 17586-18225 | 17906 | 0.01525 | <i>rpoC2-rps2</i>                          |
| 17786-18425 | 18124 | 0.01639 | <i>rpoC2-rps2</i>                          |
| 28372-29155 | 28678 | 0.01657 | <i>rpoB-trnC-GCA</i>                       |
| 28572-29410 | 29000 | 0.02356 | <i>rpoB-trnC-GCA</i>                       |
| 28894-29653 | 29264 | 0.02893 | <i>rpoB-trnC-GCA</i>                       |
| 29156-29951 | 29520 | 0.03154 | <i>rpoB-trnC-GCA</i>                       |
| 29411-30180 | 29775 | 0.02566 | <i>rpoB-trnC-GCA</i>                       |
| 29654-30958 | 30074 | 0.02252 | <i>rpoB-trnC-GCA-petN</i>                  |
| 30181-31640 | 31066 | 0.01905 | <i>trnC-GCA-petN-psbM</i>                  |
| 30959-32063 | 31467 | 0.02094 | <i>trnC-GCA-petN-psbM</i>                  |
| 31167-32292 | 31916 | 0.02417 | <i>petN-psbM</i>                           |
| 31641-32503 | 32192 | 0.0175  | <i>petN-psbM-trnD-GUC</i>                  |
| 32064-32713 | 32402 | 0.0153  | <i>petN-psbM-trnD-GUC</i>                  |
| 32293-33152 | 32603 | 0.01715 | <i>trnD-GUC-psbM</i>                       |
| 32504-33374 | 33049 | 0.01713 | <i>trnY-GUA-trnD-GUC-psbM</i>              |
| 32714-33585 | 33261 | 0.01672 | <i>trnE-UUC-trnY-GUA-trnD-GUC-psbM</i>     |
| 33153-34703 | 33485 | 0.02318 | <i>trnD-GUC-trnY-GUA-trnE-UUC-trnT-GGU</i> |
| 33375-34955 | 33790 | 0.03363 | <i>trnY-GUA-trnE-UUC-trnT-GGU</i>          |
| 33586-35176 | 34803 | 0.04315 | <i>trnE-UUC-trnT-GGU-psbD</i>              |
| 34704-35468 | 35076 | 0.03724 | <i>trnT-GGU-psbD</i>                       |
| 34959-36236 | 35313 | 0.0265  | <i>trnT-GGU-psbD</i>                       |
| 35177-36453 | 35845 | 0.02086 | <i>trnT-GGU-psbD</i>                       |
| 35469-36661 | 36336 | 0.01542 | <i>trnT-GGU-psbD</i>                       |
| 39068-39844 | 39403 | 0.01984 | <i>psbC-trnS-UGA-psbZ</i>                  |
| 39518-40269 | 39944 | 0.01693 | <i>trnS-UGA-psbZ-trnG-GCC</i>              |
| 40045-40761 | 40381 | 0.01511 | <i>psbZ-trnG-GCC-trnM-CAU</i>              |
| 46462-47250 | 46819 | 0.01552 | <i>ycf3 intron-psaA</i>                    |
| 46720-47458 | 47058 | 0.01702 | <i>ycf3 intron</i>                         |
| 48475-49162 | 48789 | 0.01652 | <i>ycf3 intron-trnS</i>                    |
| 48682-49399 | 49017 | 0.02322 | <i>ycf3-trnS-GGA</i>                       |
| 48899-49626 | 49267 | 0.02556 | <i>ycf3-trnS-GGA</i>                       |
| 49163-49865 | 49526 | 0.0242  | <i>ycf3-trnS-GGA-rps4</i>                  |
| 49404-50088 | 49740 | 0.02008 | <i>ycf3-trnS-GGA-rps4</i>                  |
| 49627-50288 | 49973 | 0.01503 | <i>trnS-GGA-rps4</i>                       |
| 50489-51209 | 50803 | 0.02015 | <i>rps4-trnT-UGU-trnL-UAA</i>              |
| 50704-51736 | 51109 | 0.02774 | <i>rps4-trnT-UGU-trnL-UAA</i>              |

|             |       |         |                                    |
|-------------|-------|---------|------------------------------------|
| 50994-51944 | 51411 | 0.02565 | <i>rps4-trnT-UGU-trnL-UAA</i>      |
| 51210-52195 | 51844 | 0.01783 | <i>trnT-UGU-trnL-UAA</i>           |
| 52830-53559 | 53141 | 0.0221  | <i>trnL-UAA-trnF-GAA-ndhJ</i>      |
| 53042-53759 | 53391 | 0.01734 | <i>trnL-trnF-ndhJ</i>              |
| 55186-56135 | 55514 | 0.01525 | <i>trnV-UAC-ndhC</i>               |
| 56565-57232 | 56919 | 0.01609 | <i>atpE-trnM-CAU-trnV-UAC</i>      |
| 61232-61912 | 61538 | 0.01534 | <i>rbcL-accD</i>                   |
| 61432-62122 | 61781 | 0.01622 | <i>rbcL-accD</i>                   |
| 61913-62538 | 62222 | 0.02153 | <i>rbcL-accD</i>                   |
| 62123-62741 | 62432 | 0.02209 | <i>accD</i>                        |
| 62323-62941 | 62641 | 0.02231 | <i>accD</i>                        |
| 63142-64195 | 63441 | 0.01725 | <i>accD-psaI</i>                   |
| 63342-64414 | 63899 | 0.01712 | <i>accD-psaI-ycf4</i>              |
| 63542-64637 | 64296 | 0.0187  | <i>accD-psaI-ycf4</i>              |
| 65122-66313 | 65421 | 0.0198  | <i>ycf4-cemA</i>                   |
| 65322-66513 | 66175 | 0.01871 | <i>ycf4-cemA</i>                   |
| 65524-66722 | 66413 | 0.01685 | <i>ycf4-cemA</i>                   |
| 67991-68622 | 68290 | 0.01989 | <i>petA-psbJ</i>                   |
| 68191-68898 | 68513 | 0.02576 | <i>petA-psbJ</i>                   |
| 68414-69140 | 68777 | 0.03367 | <i>psbJ-petA</i>                   |
| 68623-69340 | 69033 | 0.02389 | <i>petA-psbJ-psbL</i>              |
| 68899-69548 | 69240 | 0.01761 | <i>petA-psbJ-psbL</i>              |
| 69949-70690 | 70331 | 0.01528 | <i>psbE-petL</i>                   |
| 70173-70922 | 70577 | 0.0229  | <i>psbE-petL</i>                   |
| 70442-71156 | 70805 | 0.02205 | <i>psbE-petL</i>                   |
| 70691-71356 | 71029 | 0.01979 | <i>psbE-petL</i>                   |
| 70923-71579 | 71256 | 0.01717 | <i>psbE-petL-petG</i>              |
| 71157-71789 | 71479 | 0.01559 | <i>psbE-petL-petG-trnW-CCA</i>     |
| 71357-72059 | 71686 | 0.01642 | <i>petL-petG-trnW-CCA-trnP-UGG</i> |
| 71580-72320 | 71900 | 0.01722 | <i>petG-trnW-CCA-trnP-UGG-psaJ</i> |
| 71790-72535 | 72165 | 0.01907 | <i>trnW-CCA-trnP-UGG-psaJ</i>      |
| 72060-72735 | 72431 | 0.01827 | <i>trnP-psaJ-rpl33</i>             |
| 72321-73002 | 72635 | 0.01603 | <i>trnP-psaJ-rpl33</i>             |
| 73669-74311 | 73980 | 0.01705 | <i>rps18-rpl20</i>                 |
| 74994-75621 | 75317 | 0.01902 | <i>clpP-rpl20</i>                  |
| 75218-75821 | 75521 | 0.01516 | <i>clpP-rpl20</i>                  |
| 76697-77342 | 77021 | 0.01559 | <i>clpP intron</i>                 |
| 76905-77563 | 77233 | 0.02084 | <i>clpP intron</i>                 |
| 77127-77764 | 77462 | 0.01949 | <i>clpP intron</i>                 |
| 77343-78063 | 77663 | 0.02031 | <i>clpP intron-psbB</i>            |
| 79267-79914 | 79566 | 0.0154  | <i>psbB-psbT</i>                   |
| 80549-81215 | 80897 | 0.01889 | <i>psbH-petB intron</i>            |
| 80789-81426 | 81105 | 0.01617 | <i>psbH-petB intron</i>            |
| 80998-81627 | 81326 | 0.01533 | <i>petB intron</i>                 |



|               |        |         |                            |
|---------------|--------|---------|----------------------------|
| 82715-83368   | 83032  | 0.01531 | <i>petD intron</i>         |
| 85429-86041   | 85741  | 0.01619 | <i>infA-rpl36-rps11</i>    |
| 86251-86862   | 86550  | 0.01513 | <i>rpl14-rps8</i>          |
| 87510-88205   | 87809  | 0.01611 | <i>rpl16 intron</i>        |
| 87710-88412   | 88101  | 0.0202  | <i>rpl16 intron</i>        |
| 87997-88671   | 88305  | 0.01881 | <i>rpl16 intron</i>        |
| 88206-88928   | 88570  | 0.0204  | <i>rps3-rpl16 intron</i>   |
| 88413-89128   | 88804  | 0.01624 | <i>rps3-rpl16 intron</i>   |
| 115712-117664 | 117364 | 0.01811 | <i>ycf1b</i>               |
| 115912-117870 | 117564 | 0.01648 | <i>ycf1b-ndhF</i>          |
| 117465-118076 | 117770 | 0.01804 | <i>ndhF</i>                |
| 117665-118276 | 117970 | 0.01615 | <i>ndhF</i>                |
| 117871-118476 | 118176 | 0.01867 | <i>ndhF</i>                |
| 119080-120240 | 119379 | 0.02372 | <i>ndhF-rpl32</i>          |
| 119280-121149 | 119592 | 0.03547 | <i>ndhF-rpl32</i>          |
| 119480-121583 | 121049 | 0.04089 | <i>ndhF-rpl32-trnL-UAG</i> |
| 120241-122263 | 121250 | 0.03678 | <i>ndhF-rpl32-trnL-UAG</i> |
| 121150-122549 | 122154 | 0.02817 | <i>rpl32-trnL-UAG</i>      |
| 121584-122754 | 122449 | 0.02626 | <i>rpl32-trnL-UAG-ccsA</i> |
| 122264-122954 | 122654 | 0.02132 | <i>rpl32-trnL-UAG-ccsA</i> |
| 122550-123154 | 122854 | 0.02044 | <i>trnL-UAG-ccsA</i>       |
| 122755-123354 | 123054 | 0.01775 | <i>ccsA</i>                |
| 122955-123554 | 123254 | 0.01575 | <i>ccsA</i>                |
| 123155-123774 | 123454 | 0.02726 | <i>ccsA-ndhD</i>           |
| 123355-124003 | 123672 | 0.02872 | <i>ccsA-ndhD</i>           |
| 123555-124203 | 123903 | 0.02874 | <i>ccsA-ndhD</i>           |
| 123775-124403 | 124103 | 0.01546 | <i>ccsA-ndhD</i>           |
| 125404-126210 | 125705 | 0.01771 | <i>ndhE-psaC-ndhD</i>      |
| 125606-126410 | 125905 | 0.01673 | <i>ndhE-psaC</i>           |
| 125806-126671 | 126310 | 0.01947 | <i>ndhG-ndhE-psaC</i>      |
| 126411-127071 | 126771 | 0.01537 | <i>ndhG-ndhE</i>           |
| 126872-127595 | 127171 | 0.01801 | <i>ndhI-ndhG</i>           |
| 127072-127810 | 127411 | 0.02079 | <i>ndhI-ndhG</i>           |
| 127276-128010 | 127710 | 0.01873 | <i>ndhI-ndhG</i>           |
| 128618-129343 | 128917 | 0.01882 | <i>ndhA intron</i>         |
| 128818-129544 | 129156 | 0.02234 | <i>ndhA intron</i>         |
| 129032-129750 | 129444 | 0.02568 | <i>ndhA intron</i>         |
| 129344-129963 | 129644 | 0.01985 | <i>ndhA intron</i>         |
| 129545-130163 | 129851 | 0.01755 | <i>ndhA intron</i>         |
| 131564-132178 | 131872 | 0.01587 | <i>ycf1a-rps15-ndhH</i>    |
| 131773-132653 | 132072 | 0.0253  | <i>ycf1a-rps15-ndhH</i>    |
| 131973-132859 | 132476 | 0.0256  | <i>ycf1a-rps15</i>         |
| 132179-133074 | 132759 | 0.03038 | <i>ycf1a-rps15</i>         |
| 132654-133289 | 132974 | 0.0341  | <i>ycf1a-rps15</i>         |

|               |        |         |              |
|---------------|--------|---------|--------------|
| 132860-133489 | 133189 | 0.03162 | <i>ycfla</i> |
| 133075-133701 | 133389 | 0.02739 | <i>ycfla</i> |
| 133290-133907 | 133595 | 0.02333 | <i>ycfla</i> |
| 133490-134131 | 133807 | 0.02993 | <i>ycfla</i> |
| 133702-134349 | 134013 | 0.03059 | <i>ycfla</i> |
| 133908-134549 | 134249 | 0.03517 | <i>ycfla</i> |
| 134132-134782 | 134449 | 0.03349 | <i>ycfla</i> |
| 134350-134989 | 134649 | 0.03608 | <i>ycfla</i> |
| 134550-135201 | 134889 | 0.04038 | <i>ycfla</i> |
| 134783-135466 | 135101 | 0.06267 | <i>ycfla</i> |
| 134990-135666 | 135301 | 0.06629 | <i>ycfla</i> |
| 135202-135866 | 135566 | 0.05688 | <i>ycfla</i> |
| 135467-136075 | 135766 | 0.03532 | <i>ycfla</i> |
| 135667-136275 | 135966 | 0.03269 | <i>ycfla</i> |
| 135867-136484 | 136175 | 0.02725 | <i>ycfla</i> |
| 136076-136700 | 136384 | 0.02126 | <i>ycfla</i> |

---

**Table S4 Summary of major characteristics of Oenanthae chloroplast protein-coding sequences (CDSs), including nucleotide diversity (Pi), non-synonymous substitutions (Ka), synonymous substitutions (Ks), and the average of the Ka/Ks ratio ( $\omega$ ).**

| CDS         | Pi      | Ka      | Ks      | Ka/Ks          |
|-------------|---------|---------|---------|----------------|
| <i>accD</i> | 0.01778 | 0.01441 | 0.03232 | 0.49426        |
| <i>atpA</i> | 0.00643 | 0.00051 | 0.02493 | 0.06517        |
| <i>atpB</i> | 0.00603 | 0.00039 | 0.02356 | 0.05792        |
| <i>atpE</i> | 0.00603 | 0.00046 | 0.02450 | 0.36816        |
| <i>atpF</i> | 0.00675 | 0.00392 | 0.01651 | 0.29170        |
| <i>atpH</i> | 0.00224 | 0.00000 | 0.00823 | 0.00000        |
| <i>atpI</i> | 0.00466 | 0.00138 | 0.01491 | 0.16953        |
| <i>ccsA</i> | 0.01530 | 0.01307 | 0.02394 | <b>0.60474</b> |
| <i>cemA</i> | 0.00958 | 0.00470 | 0.02832 | 0.23884        |
| <i>clpP</i> | 0.00322 | 0.00000 | 0.01361 | 0.00000        |
| <i>infA</i> | 0.01269 | 0.00515 | 0.03911 | 0.18329        |
| <i>matK</i> | 0.01797 | 0.01752 | 0.02063 | <b>0.94079</b> |
| <i>ndhA</i> | 0.00763 | 0.00377 | 0.01959 | 0.22391        |
| <i>ndhB</i> | 0.00189 | 0.00132 | 0.00368 | 0.46239        |
| <i>ndhC</i> | 0.00397 | 0.00000 | 0.01711 | 0.00000        |
| <i>ndhD</i> | 0.01171 | 0.00461 | 0.03522 | 0.17590        |
| <i>ndhE</i> | 0.00964 | 0.00556 | 0.02349 | 0.34425        |
| <i>ndhF</i> | 0.01529 | 0.00933 | 0.03653 | 0.29190        |
| <i>ndhG</i> | 0.01051 | 0.00455 | 0.02987 | 0.25658        |
| <i>ndhH</i> | 0.00819 | 0.00199 | 0.03027 | 0.10142        |
| <i>ndhI</i> | 0.00650 | 0.00277 | 0.01964 | 0.23348        |
| <i>ndhJ</i> | 0.00286 | 0.00243 | 0.00443 | 0.31150        |
| <i>ndhK</i> | 0.00837 | 0.00589 | 0.01652 | 0.46243        |
| <i>petA</i> | 0.00843 | 0.00286 | 0.02674 | 0.13132        |
| <i>petB</i> | 0.00429 | 0.00049 | 0.01625 | 0.16385        |
| <i>petD</i> | 0.00602 | 0.00106 | 0.02152 | 0.16220        |
| <i>petG</i> | 0.00336 | 0.00000 | 0.01326 | 0.00000        |
| <i>petL</i> | 0.00974 | 0.00000 | 0.03613 | 0.00000        |
| <i>psaA</i> | 0.00416 | 0.00029 | 0.01698 | 0.04395        |
| <i>psaB</i> | 0.00459 | 0.00046 | 0.01878 | 0.03834        |
| <i>psaC</i> | 0.00882 | 0.00036 | 0.03838 | 0.12586        |
| <i>psaI</i> | 0.00283 | 0.00000 | 0.01259 | 0.00000        |
| <i>psaJ</i> | 0.00296 | 0.00398 | 0.00000 | /              |
| <i>psbA</i> | 0.00459 | 0.00016 | 0.01923 | 0.10606        |
| <i>psbB</i> | 0.00702 | 0.00128 | 0.02583 | 0.06279        |
| <i>psbC</i> | 0.00536 | 0.00077 | 0.01980 | 0.06380        |
| <i>psbD</i> | 0.00380 | 0.00000 | 0.01644 | 0.00000        |
| <i>psbE</i> | 0.00027 | 0.00000 | 0.00116 | 0.00000        |
| <i>psbF</i> | 0.00468 | 0.00000 | 0.01801 | 0.00000        |
| <i>psbH</i> | 0.00551 | 0.00196 | 0.01640 | 0.28219        |

|              |         |         |         |                |
|--------------|---------|---------|---------|----------------|
| <i>psbI</i>  | 0.00234 | 0.00000 | 0.00962 | 0.00000        |
| <i>psbJ</i>  | 0.00600 | 0.00276 | 0.01503 | 0.36624        |
| <i>psbK</i>  | 0.00538 | 0.00528 | 0.00605 | <b>0.56387</b> |
| <i>psbL</i>  | 0.00058 | 0.00000 | 0.00282 | 0.00000        |
| <i>psbM</i>  | 0.01281 | 0.00865 | 0.02844 | 0.36401        |
| <i>psbT</i>  | 0.00655 | 0.00089 | 0.02520 | 0.31019        |
| <i>psbZ</i>  | 0.00136 | 0.00134 | 0.00144 | 0.33180        |
| <i>rbcL</i>  | 0.00633 | 0.00442 | 0.01250 | <b>0.55514</b> |
| <i>rpl2</i>  | 0.00199 | 0.00047 | 0.00656 | 0.16979        |
| <i>rpl14</i> | 0.00827 | 0.00181 | 0.02898 | 0.16040        |
| <i>rpl16</i> | 0.00872 | 0.00225 | 0.02838 | 0.13239        |
| <i>rpl20</i> | 0.00603 | 0.00617 | 0.00578 | <b>0.60516</b> |
| <i>rpl22</i> | 0.01236 | 0.00742 | 0.02973 | 0.29621        |
| <i>rpl23</i> | 0.00070 | 0.00060 | 0.00105 | 0.30128        |
| <i>rpl32</i> | 0.02210 | 0.01511 | 0.04961 | 0.31272        |
| <i>rpl33</i> | 0.00442 | 0.00173 | 0.01364 | 0.30772        |
| <i>rpl36</i> | 0.00120 | 0.00080 | 0.00250 | 0.31332        |
| <i>rpoA</i>  | 0.01034 | 0.00961 | 0.01330 | <b>0.83790</b> |
| <i>rpoB</i>  | 0.00529 | 0.00225 | 0.01545 | 0.15556        |
| <i>rpoC1</i> | 0.00631 | 0.00254 | 0.01892 | 0.16932        |
| <i>rpoC2</i> | 0.00918 | 0.00548 | 0.02186 | 0.27100        |
| <i>rps2</i>  | 0.00735 | 0.00301 | 0.02264 | 0.17565        |
| <i>rps3</i>  | 0.00779 | 0.00473 | 0.01883 | 0.29398        |
| <i>rps4</i>  | 0.00674 | 0.00393 | 0.01591 | 0.30822        |
| <i>rps7</i>  | 0.00014 | 0.00000 | 0.00059 | 0.00000        |
| <i>rps8</i>  | 0.01184 | 0.00810 | 0.02388 | 0.46571        |
| <i>rps11</i> | 0.00908 | 0.00447 | 0.02263 | 0.34165        |
| <i>rps12</i> | 0.00296 | 0.00038 | 0.01022 | 0.33800        |
| <i>rps14</i> | 0.00644 | 0.00560 | 0.00942 | <b>0.50679</b> |
| <i>rps15</i> | 0.01957 | 0.01848 | 0.02519 | <b>0.88107</b> |
| <i>rps16</i> | 0.02135 | 0.00960 | 0.05941 | 0.21889        |
| <i>rps18</i> | 0.00521 | 0.00162 | 0.01716 | 0.17227        |
| <i>rps19</i> | 0.01184 | 0.00394 | 0.03992 | 0.20952        |
| <i>ycf1a</i> | 0.02602 | 0.02460 | 0.03425 | <b>0.72298</b> |
| <i>ycf1b</i> | 0.00650 | 0.00648 | 0.00674 | <b>0.92539</b> |
| <i>ycf2</i>  | 0.00322 | 0.00312 | 0.00362 | <b>1.01611</b> |
| <i>ycf3</i>  | 0.00377 | 0.00000 | 0.01642 | 0.00000        |
| <i>ycf4</i>  | 0.00950 | 0.00426 | 0.02732 | 0.17746        |

---

**Table S5 The nucleotide diversity (Pi) of 11 genes with introns, including Pi for genes, introns, and CDSs.**

| Gene name    | Gene    | Intron  | CDS     |
|--------------|---------|---------|---------|
| <i>atpF</i>  | 0.00957 | 0.01172 | 0.00675 |
| <i>clpP</i>  | 0.01249 | 0.01639 | 0.00322 |
| <i>ndhA</i>  | 0.01448 | 0.02134 | 0.00763 |
| <i>ndhB</i>  | 0.00177 | 0.00152 | 0.00189 |
| <i>petB</i>  | 0.01044 | 0.01572 | 0.00429 |
| <i>petD</i>  | 0.01004 | 0.01267 | 0.00602 |
| <i>rpl2</i>  | 0.00288 | 0.00403 | 0.00199 |
| <i>rpl16</i> | 0.01811 | 0.02269 | 0.00872 |
| <i>rpoC1</i> | 0.00787 | 0.01228 | 0.00631 |
| <i>rps16</i> | 0.01782 | 0.01679 | 0.02135 |
| <i>ycf3</i>  | 0.01163 | 0.01484 | 0.00377 |

**Table S6 The nucleotide diversity (Pi), aligned length (bp), Variable sites, Parsimony-informative sites, and percent of Parsimony-informative of four fragments previously used and seven candidate barcode makers for phylogenetic analyses of Oenantheae.**

| DNAfragment                | pi      | Aligned length (bp) | Variable sites | Parsimony-informative sites | percent of Parsimony-informative |
|----------------------------|---------|---------------------|----------------|-----------------------------|----------------------------------|
| <i>rps16 intron</i>        | 0.01679 | 906                 | 75             | 43                          | 4.75                             |
| <i>trnQ-trnK</i>           | 0.02213 | 3618                | 382            | 231                         | 6.38                             |
| <i>psbI-trnK</i>           | 0.02002 | 4761                | 466            | 283                         | 5.94                             |
| <i>rps16 intron-trnK</i>   | 0.02214 | 2086                | 215            | 130                         | 6.23                             |
| <i>ndhF-rpl32-trnL</i>     | 0.03625 | 2930                | 590            | 304                         | 10.38                            |
| <i>psbJ-petA</i>           | 0.03438 | 726                 | 83             | 63                          | 8.68                             |
| <i>rpoB-trnC</i>           | 0.03049 | 799                 | 80             | 57                          | 7.13                             |
| <i>rps16-trnK</i>          | 0.02952 | 927                 | 107            | 68                          | 7.34                             |
| <i>trnY-trnE-trnT-psbD</i> | 0.03757 | 2031                | 352            | 226                         | 11.13                            |
| <i>rps15-ycf1a</i>         | 0.03331 | 1111                | 135            | 88                          | 7.92                             |
| <i>ycf1a</i>               | 0.04115 | 2573                | 288            | 264                         | 10.26                            |

**Table S7 The potential positive selection test on Oenantheae.**

| Gene        | Null hypothesis (M7) |    | Alternative hypothesis (M8) |    | Significance test                                                                                                                                                                    |                         |                           |
|-------------|----------------------|----|-----------------------------|----|--------------------------------------------------------------------------------------------------------------------------------------------------------------------------------------|-------------------------|---------------------------|
|             | lnL                  | np | lnL                         | np | Positively selected sites (BEB, *: PP > 95%; **: PP > 99%)                                                                                                                           | LRT P-value (M7 vs. M8) | LRT P-value (M1a vs. M2a) |
| <i>accD</i> | -2807.879949         | 61 | -2795.571799                | 63 | 42 R 0.946,73 R 0.856,77 G 0.706,94 Y 0.814,97 I 0.565,98 E 0.684,99 N 0.851,100 H 0.983*,108 H 0.910,119 Y 0.905,201 T 0.821,207 K 0.954*,351 N 0.685                               | 0.000004515             | 0.000000015               |
| <i>rbcL</i> | -2338.212906         | 61 | -2308.319122                | 63 | 28 D 0.974*,91 A 1.000**,95 N 0.997**,97 Y 0.998**,225 I 0.997**,309 I 0.998**,328 S 1.000**,354 I 0.956*,355 A 0.972*,424 L 0.659,429 Q 0.600,443 E 0.998**,461 V 0.510,470 Q 0.587 | 0.000000000             | 0.000000000               |
| <i>rps8</i> | -806.420213          | 61 | -769.258678                 | 63 | 57 D 1.000**                                                                                                                                                                         | 0.000000000             | 0.000000000               |

|              |               |    |               |                                                         |                                        |             |
|--------------|---------------|----|---------------|---------------------------------------------------------|----------------------------------------|-------------|
|              |               |    |               | 200 S 0.652,205 K 0.713,206 Y 0.779,217 S               |                                        |             |
|              |               |    |               | 0.649,270 V 0.887, <b>469 R 0.960*</b> ,540 R 0.929,673 |                                        |             |
|              |               |    |               | L 0.930,694 F 0.938,703 K 0.701,707 V 0.885,716         |                                        |             |
|              |               |    |               | V 0.780,738 Q 0.940,741 F 0.537,742 I 0.537,751         |                                        |             |
|              |               |    |               | A 0.633,776 K 0.922, <b>795 V 0.982*</b> ,799 L         |                                        |             |
|              |               |    |               | 0.665,810 K 0.835,834 T 0.644,862 I 0.806,903 N         |                                        |             |
|              |               |    |               | 0.839,917 T 0.778,922 P 0.813,946 N 0.781,948 Q         |                                        |             |
|              |               |    |               | 0.589,949 A 0.566,950 I 0.541,960 E 0.532,962 T         |                                        |             |
|              |               |    |               | 0.553,963 K 0.745,964 K 0.940,966 I 0.520,989 S         |                                        |             |
|              |               |    |               | 0.628,1000 L 0.765,1005 K 0.926,1006 M                  |                                        |             |
|              |               |    |               | 0.618,1011 Q 0.517, <b>1014 K 0.971*</b> ,1018 Y        |                                        |             |
|              |               |    |               | 0.870,1021 R 0.702,1032 M 0.507,1040 Y                  |                                        |             |
| <i>ycf1a</i> | -12032.711716 | 61 | -12008.804003 | 63                                                      | 0.579,1051 T 0.549,1063 S 0.561,1069 N | 0.000000000 |
|              |               |    |               | 0.876,1072 N 0.716,1084 - 0.662, <b>1085 I</b>          |                                        | 0.000000000 |
|              |               |    |               | <b>0.969*,1092 K 1.000**,1093 I 0.965*,1094 L</b>       |                                        |             |
|              |               |    |               | <b>0.986*,1111 Y 0.962*</b> ,1115 K 0.566,1136 P        |                                        |             |
|              |               |    |               | 0.688,1139 L 0.654,1168 N 0.556,1193 R                  |                                        |             |
|              |               |    |               | 0.924,1234 G 0.913,1239 L 0.612,1242 T                  |                                        |             |
|              |               |    |               | 0.868,1251 G 0.666,1265 S 0.649,1303 D                  |                                        |             |
|              |               |    |               | 0.862,1305 I 0.785,1320 Q 0.731,1393 Y                  |                                        |             |
|              |               |    |               | 0.572,1397 L 0.806,1408 - 0.502,1410 H                  |                                        |             |
|              |               |    |               | 0.560,1415 - 0.859,1419 G 0.681,1428 S                  |                                        |             |
|              |               |    |               | 0.893,1475 A 0.575,1501 I 0.794,1511 E                  |                                        |             |
|              |               |    |               | 0.516,1548 L 0.670,1551 L 0.656,1554 -                  |                                        |             |
|              |               |    |               | 0.514,1560 H 0.628,1596 S 0.784,1622 I                  |                                        |             |

0.552,1710 D 0.717,1734 R 0.605,1750 L  
0.750,1805 R 0.911,1806 V 0.552,1818 P 0.687

|             |              |    |              |    |                                                                                                                                                                                                                                                                                                                                                                                                                                                                                                                                                                                                                                                                                                                               |             |             |
|-------------|--------------|----|--------------|----|-------------------------------------------------------------------------------------------------------------------------------------------------------------------------------------------------------------------------------------------------------------------------------------------------------------------------------------------------------------------------------------------------------------------------------------------------------------------------------------------------------------------------------------------------------------------------------------------------------------------------------------------------------------------------------------------------------------------------------|-------------|-------------|
| <i>yef2</i> | -9606.539455 | 61 | -9577.122638 | 63 | 8 L 0.536,13 L 0.545,58 W 0.562,67 Q 0.545, <b>103</b><br><b>F 1.000**</b> ,189 R 0.532,196 G 0.545,213 S<br>0.563,257 G 0.541,271 Q 0.542,293 R 0.516,296 F<br>0.529,317 Q 0.947,368 L 0.557,387 P 0.534,430 D<br>0.937,438 A 0.566, <b>503 Q 0.996**</b> ,506 M<br>0.936,510 G 0.543,552 H 0.569,592 W 0.560,598<br>L 0.542,617 W 0.562,645 R 0.562,649 R<br>0.516,652 Q 0.522, <b>746 L 0.996**</b> ,821 R 0.947, <b>833</b><br><b>R 0.955*</b> ,863 Y 0.941, <b>915 P 0.950*</b> ,942 A<br>0.507,969 P 0.511,1022 E 0.525, <b>1025 Q</b><br><b>0.951*</b> ,1039 L 0.556,1061 L 0.546,1087 R<br>0.564,1167 L 0.554,1273 S 0.944,1303 R<br>0.515,1308 T 0.516,1317 R 0.515,1365 L<br>0.550,1525 E 0.527,1604 C 0.504,1666 Y | 0.000000000 | 0.000000000 |
|-------------|--------------|----|--------------|----|-------------------------------------------------------------------------------------------------------------------------------------------------------------------------------------------------------------------------------------------------------------------------------------------------------------------------------------------------------------------------------------------------------------------------------------------------------------------------------------------------------------------------------------------------------------------------------------------------------------------------------------------------------------------------------------------------------------------------------|-------------|-------------|



0.510,1742 V 0.520,1840 W 0.566,1871 G  
 0.542,1881 L 0.555,1919 R 0.567,1931 E  
 0.945,1959 S 0.563,1974 R 0.947,2028 T  
 0.516,2089 G 0.542

|              |              |    |              |    |                                                                                                                                                                                                                                                                                                                                                                                           |             |             |
|--------------|--------------|----|--------------|----|-------------------------------------------------------------------------------------------------------------------------------------------------------------------------------------------------------------------------------------------------------------------------------------------------------------------------------------------------------------------------------------------|-------------|-------------|
|              |              |    |              |    | 4 K 0.730,56 G 0.779,113 L 0.709,115 Y<br>0.741,121 R 0.747,198 N 0.713,200 S <b>0.976*,205</b><br><b>K 0.994**,206 Y 0.980*,215 R 0.975*,217 S</b><br><b>0.975*,222 F 0.702,224 I 0.715,244 N 0.971*,254</b><br>- 0.807,259 E 0.786,269 A 0.761,270 K<br><b>1.000**,271 D 0.754</b><br>67 S 0.820,220 N 0.734,230 L 0.688,306 F<br>0.775,428 L 0.544,463 N 0.617,465 Q <b>0.988*,488</b> |             |             |
| <i>ycf1b</i> | -1347.463536 | 61 | -1333.528946 | 63 | I 0.858,498 L 0.673,516 T 0.828,525 N 0.829,535<br>R 0.927,549 D 0.551,630 L 0.645,655 N<br><b>0.952*,663 C 1.000**,733 L 0.744</b><br><b>198 I 0.960*,341 L 0.826</b>                                                                                                                                                                                                                    | 0.000000888 | 0.000000131 |
| <i>ndhF</i>  | -4463.537830 | 61 | -4451.301461 | 63 | 3 Y 0.551,165 R 0.847,181 F <b>0.964*,208 P</b><br>0.550,212 L 0.898,213 H 0.803,214 F 0.503,215 S<br>0.845,218 K <b>0.957*,219 V 0.831</b>                                                                                                                                                                                                                                               | 0.000004851 | 0.000065086 |
| <i>ndhH</i>  | -1979.406149 | 61 | -1973.758070 | 63 | 6 P 0.546,14 G <b>0.993**</b><br>17 S 0.533,49 V 0.847,102 V 0.821,124 I<br>0.780,131 Q 0.581,133 I 0.826                                                                                                                                                                                                                                                                                 | 0.003524280 | 0.082768146 |
| <i>ndhK</i>  | -1154.319395 | 61 | -1149.827692 | 63 |                                                                                                                                                                                                                                                                                                                                                                                           | 0.011201551 | 0.022716790 |
| <i>rps11</i> | -693.771380  | 61 | -689.366259  | 63 |                                                                                                                                                                                                                                                                                                                                                                                           | 0.012214628 | 0.054106065 |
| <i>ndhG</i>  | -862.414305  | 61 | -859.588574  | 63 |                                                                                                                                                                                                                                                                                                                                                                                           | 0.059265318 | 0.184379896 |

|              |              |    |              |    |                                                                                                                                                                                                                                                                                                                                                                                                                    |             |             |
|--------------|--------------|----|--------------|----|--------------------------------------------------------------------------------------------------------------------------------------------------------------------------------------------------------------------------------------------------------------------------------------------------------------------------------------------------------------------------------------------------------------------|-------------|-------------|
| <i>rpoC2</i> | -7312.611360 | 61 | -7310.120403 | 63 | 238 N 0.697, <b>239 I 0.969*</b> ,509 S 0.764,511 S<br>0.773,524 F 0.807,528 D 0.710,540 Y 0.755,764 T<br>0.817,796 Q 0.817,974 R 0.934,995 L 0.790,1040<br>F 0.726,1356 F 0.805,1367 S 0.827,1369 N 0.697<br>39 R 0.642,76 F 0.665,78 I 0.824,87 I 0.629,129 H<br>0.558,190 R 0.599,233 S 0.544,238 T 0.909,287 S<br>0.668,356 A 0.658,358 L 0.901,406 V 0.544,410 G<br>0.733,428 T 0.566,442 R 0.646,460 D 0.726 | 0.082830660 | 0.347241769 |
| <i>matK</i>  | -3099.192238 | 61 | -3096.756958 | 63 | 17 R 0.945                                                                                                                                                                                                                                                                                                                                                                                                         | 0.087573223 | 0.185427557 |
| <i>rps19</i> | -441.468244  | 61 | -439.097584  | 63 | <b>12 R 0.964*</b> ,83 H 0.566,89 Q 0.558,105 K<br>0.825,112 S 0.597                                                                                                                                                                                                                                                                                                                                               | 0.093419049 | 0.392793598 |
| <i>rpl20</i> | -608.635498  | 61 | -606.296830  | 63 | 23 K 0.911,26 L 0.852,48 C 0.927,49 A 0.842,50 T<br>0.635                                                                                                                                                                                                                                                                                                                                                          | 0.096456032 | 0.117651549 |
| <i>rpl32</i> | -350.197154  | 61 | -348.220010  | 63 | 5 K 0.787,126 L 0.725,131 I 0.896                                                                                                                                                                                                                                                                                                                                                                                  | 0.138464127 | 0.161286983 |
| <i>rpl22</i> | -920.192400  | 61 | -918.588586  | 63 | 5 K 0.811,15 T 0.801                                                                                                                                                                                                                                                                                                                                                                                               | 0.201127951 | 0.261510198 |
| <i>petA</i>  | -1544.285542 | 61 | -1542.682774 | 63 | 37 S 0.905,38 K 0.615                                                                                                                                                                                                                                                                                                                                                                                              | 0.201338441 | 0.776470988 |
| <i>psbM</i>  | -185.617085  | 61 | -184.086270  | 63 | <b>33 K 0.972*</b>                                                                                                                                                                                                                                                                                                                                                                                                 | 0.216359263 | 0.415684384 |
| <i>psbT</i>  | -148.916361  | 61 | -147.428665  | 63 |                                                                                                                                                                                                                                                                                                                                                                                                                    | 0.225892513 | 0.225960517 |
| <i>rpl16</i> | -659.824215  | 61 | -658.357974  | 63 |                                                                                                                                                                                                                                                                                                                                                                                                                    | 0.230791402 | 0.957032431 |
| <i>rpoC1</i> | -3257.765388 | 61 | -3256.376813 | 63 | 442 P 0.818,635 S 0.791,651 S 0.774                                                                                                                                                                                                                                                                                                                                                                                | 0.249430490 | 0.976402871 |
| <i>ndhE</i>  | -483.182677  | 61 | -481.805802  | 63 | 92 C 0.797                                                                                                                                                                                                                                                                                                                                                                                                         | 0.252365966 | 0.797258748 |
| <i>atpB</i>  | -2320.496553 | 61 | -2319.146900 | 63 | 8 - 0.804                                                                                                                                                                                                                                                                                                                                                                                                          | 0.259330233 | 0.883818990 |
| <i>ycf4</i>  | -932.434559  | 61 | -931.348889  | 63 | 50 S 0.784,152 I 0.753                                                                                                                                                                                                                                                                                                                                                                                             | 0.337675468 | 0.710639507 |
| <i>ndhJ</i>  | -702.172305  | 61 | -701.141703  | 63 | 46 Y 0.808                                                                                                                                                                                                                                                                                                                                                                                                         | 0.356792107 | 0.822973729 |
| <i>rpoA</i>  | -1424.098366 | 61 | -1423.110963 | 63 | 68 E 0.774,167 Q 0.712,266 R 0.737,268 K<br>0.931,271 K 0.672                                                                                                                                                                                                                                                                                                                                                      | 0.372542930 | 0.399142413 |
| <i>rps16</i> | -447.853147  | 61 | -446.929328  | 63 | 54 L 0.716,55 Y 0.521,65 G 0.683                                                                                                                                                                                                                                                                                                                                                                                   | 0.396999999 | 0.828506994 |

|              |              |    |              |    |                                                                                     |             |             |
|--------------|--------------|----|--------------|----|-------------------------------------------------------------------------------------|-------------|-------------|
| <i>ndhD</i>  | -2635.607342 | 61 | -2634.697438 | 63 | 37 I 0.713, 212 I 0.708, 395 V 0.713, 449 A 0.735,<br>468 I 0.772                   | 0.402562868 | 0.999937002 |
| <i>psaJ</i>  | -184.185810  | 61 | -183.325378  | 63 | <b>10 V 0.977*,14 L 0.977*,36 A 0.977*</b>                                          | 0.422979316 | 0.423014425 |
| <i>ndhI</i>  | -792.471979  | 61 | -793.312180  | 63 |                                                                                     | 0.431623758 | 0.999943002 |
| <i>rps2</i>  | -1092.237722 | 61 | -1091.516423 | 63 | 226 R 0.829                                                                         | 0.486120375 | 0.894594264 |
| <i>rps15</i> | -524.481381  | 61 | -523.915873  | 63 | 5 P 0.911,10 I 0.624                                                                | 0.568071493 | 0.586282807 |
| <i>rps12</i> | -697.476723  | 61 | -696.916972  | 63 | 25 R 0.520,63 R 0.520                                                               | 0.571351313 | 0.596940999 |
| <i>atpF</i>  | -898.063576  | 61 | -897.627419  | 63 | 130 H 0.799                                                                         | 0.646516215 | 0.858517684 |
| <i>rpl36</i> | -145.169081  | 61 | -144.745738  | 63 | 15 R 0.531                                                                          | 0.654853980 | 0.987241094 |
| <i>infA</i>  | -389.600505  | 61 | -389.229217  | 63 | 30 M 0.677                                                                          | 0.689845238 | 0.999687049 |
| <i>cemA</i>  | -1151.968800 | 61 | -1151.598357 | 63 | 24 S 0.715, 80 H 0.711, 133 I 0.691                                                 | 0.690428403 | 0.805069234 |
| <i>rps14</i> | -473.337682  | 61 | -472.994676  | 63 | 33 K 0.741                                                                          | 0.709633954 | 0.732919797 |
| <i>psbK</i>  | -279.386715  | 61 | -279.113678  | 63 | 4 I 0.833,6 S 0.829,9 C 0.838,20 S 0.829,22 F<br>0.826,36 I 0.833                   | 0.761064628 | 0.761085938 |
| <i>ccsA</i>  | -1796.358387 | 61 | -1796.201534 | 63 | 31 I 0.675,57 V 0.742,62 Y 0.682,169 I 0.648,171<br>L 0.649,281 R 0.683,294 M 0.649 | 0.854829710 | 0.857317458 |
| <i>rps18</i> | -442.187822  | 61 | -442.304285  | 63 |                                                                                     | 0.890063029 | 0.999993000 |
| <i>ndhA</i>  | -1741.995258 | 61 | -1741.879124 | 63 | 290 Y 0.781                                                                         | 0.890355908 | 1.000000000 |
| <i>rpoB</i>  | -5066.312129 | 61 | -5066.232909 | 63 | 113 S 0.693,803 T 0.704                                                             | 0.923836658 | 0.999999000 |
| <i>psaC</i>  | -383.037984  | 61 | -382.967272  | 63 |                                                                                     | 0.931730192 | 0.968107640 |
| <i>rpl33</i> | -303.802471  | 61 | -303.871651  | 63 |                                                                                     | 0.933158696 | 0.999998000 |
| <i>rpl2</i>  | -1145.077094 | 61 | -1145.105836 | 63 |                                                                                     | 0.971667122 | 0.999995000 |
| <i>psbH</i>  | -321.170633  | 61 | -321.176627  | 63 |                                                                                     | 0.994023928 | 0.999986000 |
| <i>psbA</i>  | -1583.765864 | 61 | -1583.762377 | 63 |                                                                                     | 0.996519073 | 0.999829015 |
| <i>rps4</i>  | -995.602728  | 61 | -995.605847  | 63 | 39 G 0.709                                                                          | 0.996885859 | 0.999919003 |
| <i>psaB</i>  | -3325.314981 | 61 | -3325.316754 | 63 |                                                                                     | 0.998228571 | 0.999876008 |

|              |              |    |              |    |            |             |             |
|--------------|--------------|----|--------------|----|------------|-------------|-------------|
| <i>psbJ</i>  | -156.066366  | 61 | -156.068121  | 63 |            | 0.998246539 | 1.000000000 |
| <i>atpI</i>  | -1168.251501 | 61 | -1168.253237 | 63 |            | 0.998265506 | 0.999979000 |
| <i>psbD</i>  | -1540.624846 | 61 | -1540.625372 | 63 |            | 0.999474138 | 0.999474138 |
| <i>petD</i>  | -731.385686  | 61 | -731.385168  | 63 |            | 0.999482134 | 0.999956001 |
| <i>clpP</i>  | -852.037339  | 61 | -852.037854  | 63 |            | 0.999485133 | 0.949737166 |
| <i>petB</i>  | -960.354285  | 61 | -960.353781  | 63 |            | 0.999496127 | 0.999988000 |
| <i>atpE</i>  | -613.557310  | 61 | -613.556955  | 63 |            | 0.999645063 | 0.999992000 |
| <i>rps3</i>  | -1044.374085 | 61 | -1044.374408 | 63 | 66 Q 0.736 | 0.999677052 | 1.000000000 |
| <i>psaA</i>  | -3421.244905 | 61 | -3421.244683 | 63 |            | 0.999778025 | 0.999864009 |
| <i>atpA</i>  | -2339.733466 | 61 | -2339.733649 | 63 |            | 0.999817017 | 0.999817017 |
| <i>ndhC</i>  | -500.271983  | 61 | -500.272150  | 63 |            | 0.999833014 | 0.999763028 |
| <i>psbE</i>  | -337.581417  | 61 | -337.581564  | 63 |            | 0.999853011 | 0.999887006 |
| <i>ndhB</i>  | -2141.438674 | 61 | -2141.438796 | 63 |            | 0.999878007 | 0.999998000 |
| <i>petG</i>  | -155.688500  | 61 | -155.688603  | 63 |            | 0.999897005 | 0.999896005 |
| <i>psbC</i>  | -2165.754258 | 61 | -2165.754163 | 63 |            | 0.999905005 | 0.999762028 |
| <i>atpH</i>  | -324.714368  | 61 | -324.714448  | 63 |            | 0.999920003 | 0.999921003 |
| <i>petL</i>  | -129.581838  | 61 | -129.581905  | 63 |            | 0.999933002 | 0.985862881 |
| <i>psbB</i>  | -2388.667780 | 61 | -2388.667829 | 63 |            | 0.999951001 | 0.999952001 |
| <i>psbF</i>  | -166.854517  | 61 | -166.854566  | 63 |            | 0.999951001 | 0.999947001 |
| <i>psbI</i>  | -149.635607  | 61 | -149.635648  | 63 |            | 0.999959001 | 0.975558648 |
| <i>psaI</i>  | -141.340114  | 61 | -141.340146  | 63 |            | 0.999968001 | 0.999945002 |
| <i>rpl23</i> | -379.261634  | 61 | -379.261617  | 63 | 66 M 0.534 | 0.999983000 | 0.999080423 |
| <i>rpl14</i> | -588.983752  | 61 | -588.983762  | 63 |            | 0.999990000 | 0.999992000 |
| <i>psbZ</i>  | -241.697335  | 61 | -241.697336  | 63 |            | 0.999999000 | 1.000000000 |

---

**Fig. S1 GC contents of the Oenanthaceae whole genome, large single copy region (LSC), small single copy region (SSC), and inverted repeat regions (IRs).**

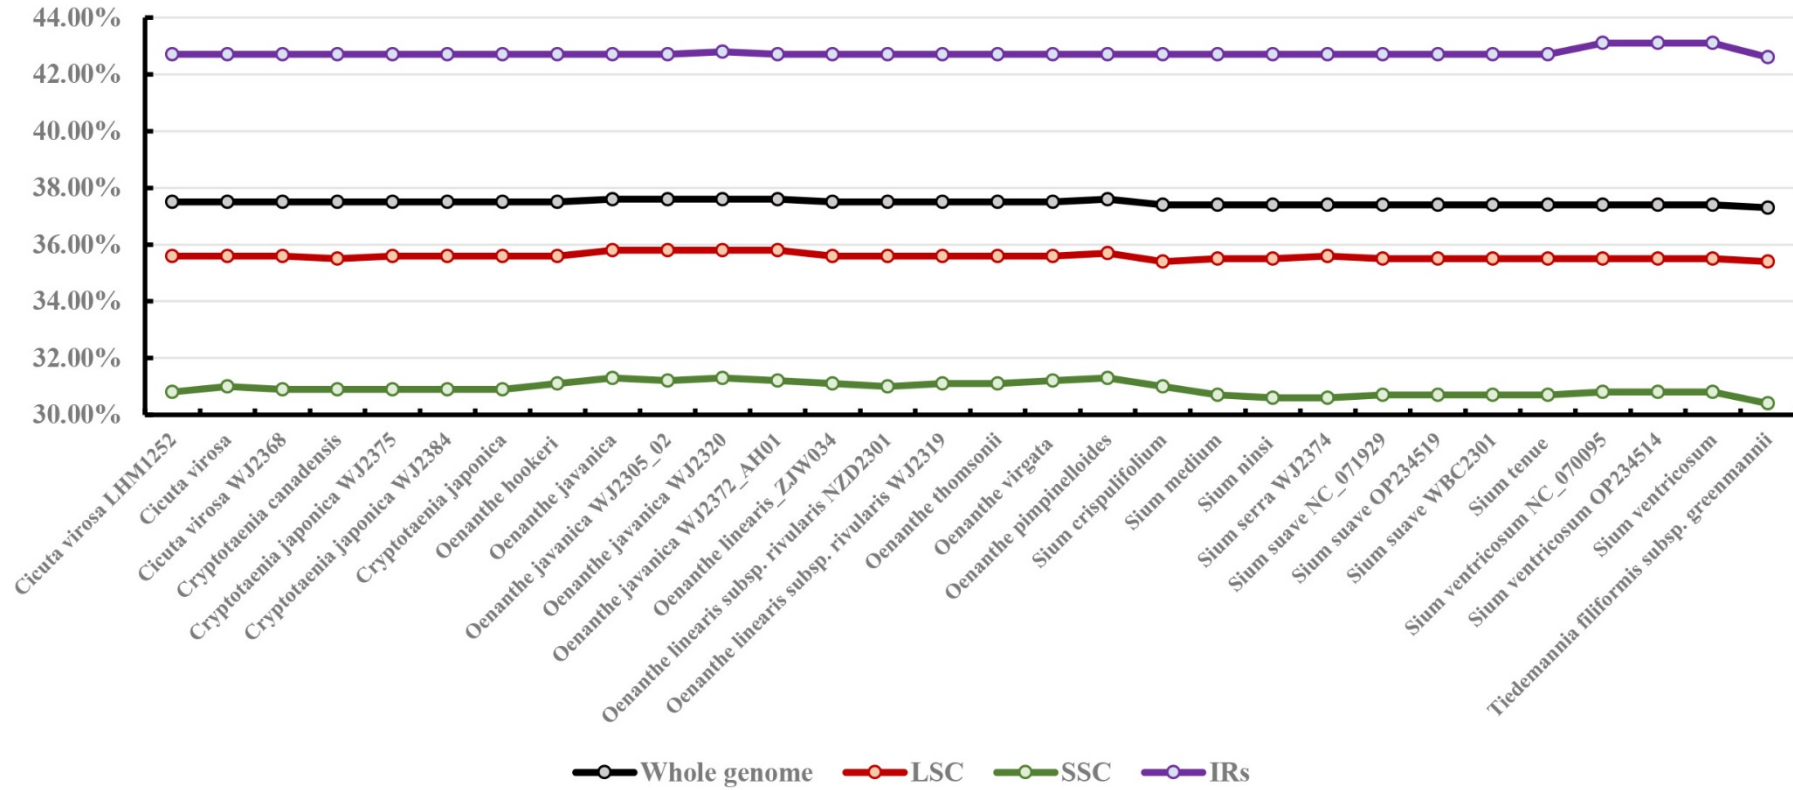

**Fig. S2 MAUVE alignment of 30 *Oenanthe* chloroplast genomes using Geneious.**

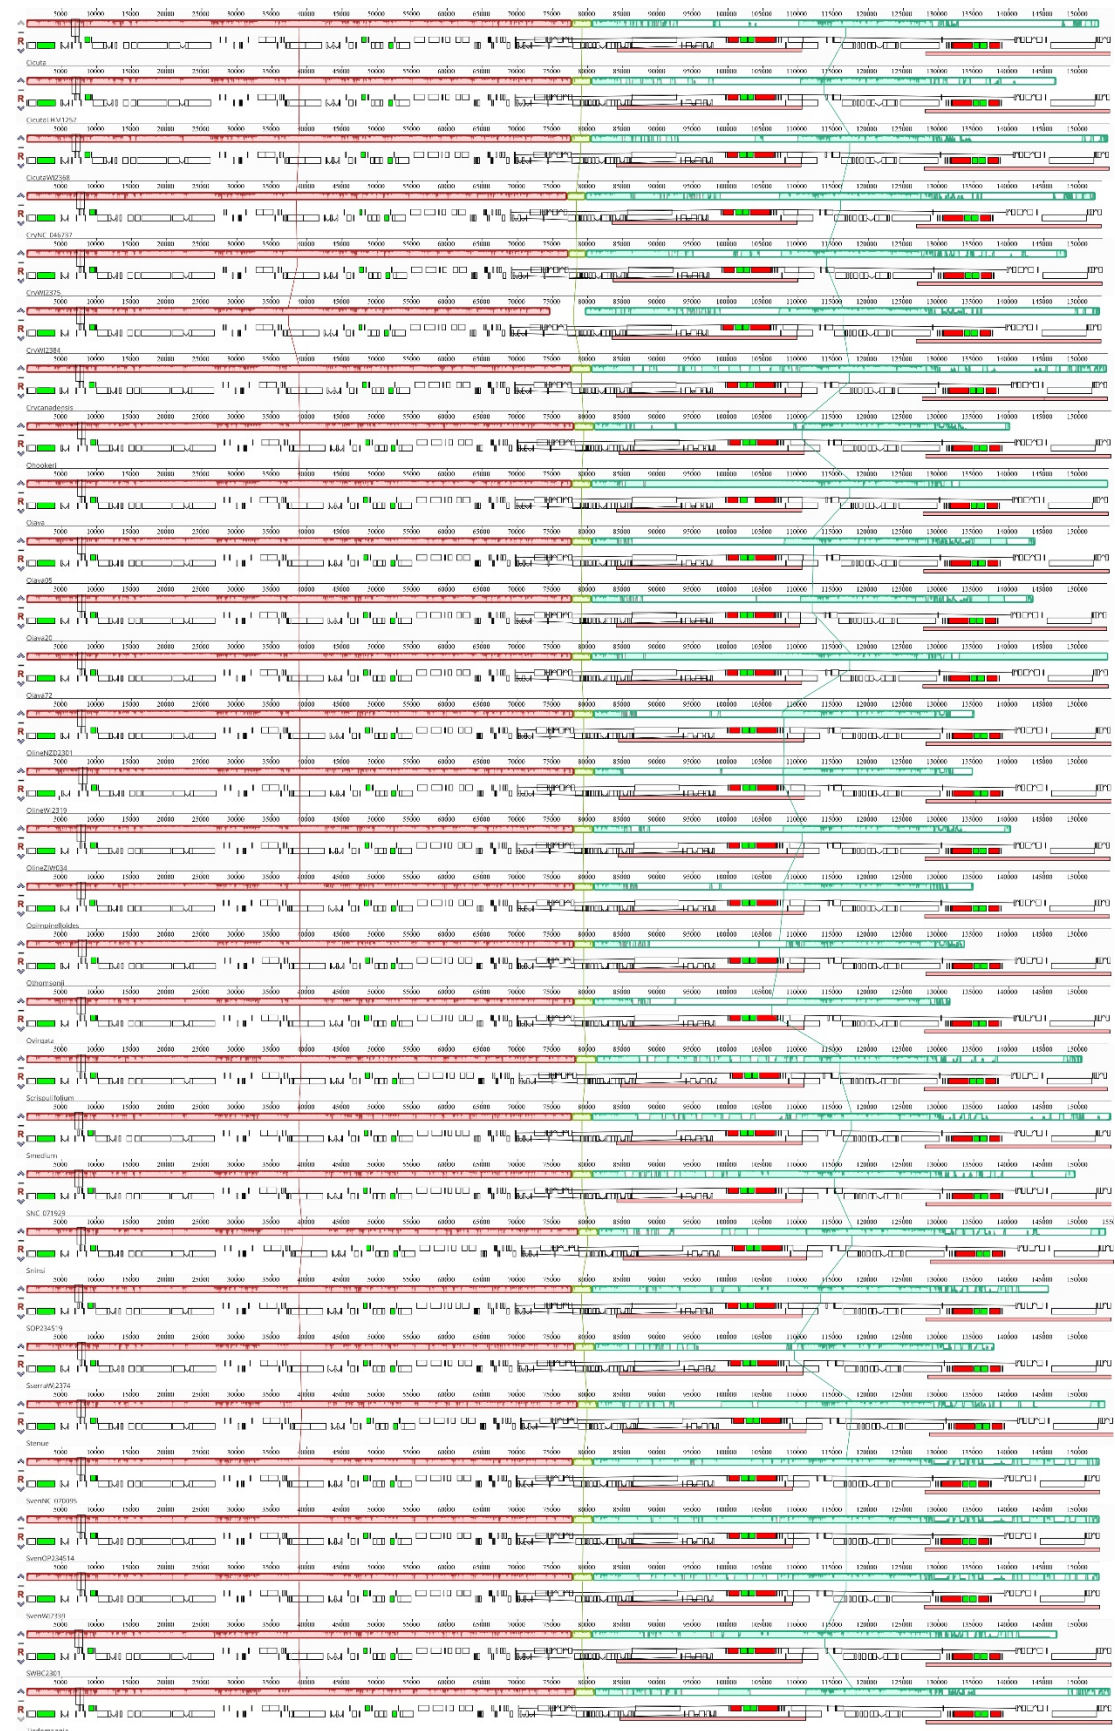

Fig. S3 The voucher specimens of 17 newly sequenced species were deposited in NAS (Herbarium, Institute of Botany, Chinese Academy of Sciences, Jiangsu Province).

1. NAS00640404: *Cicuta virosa* LHM1252

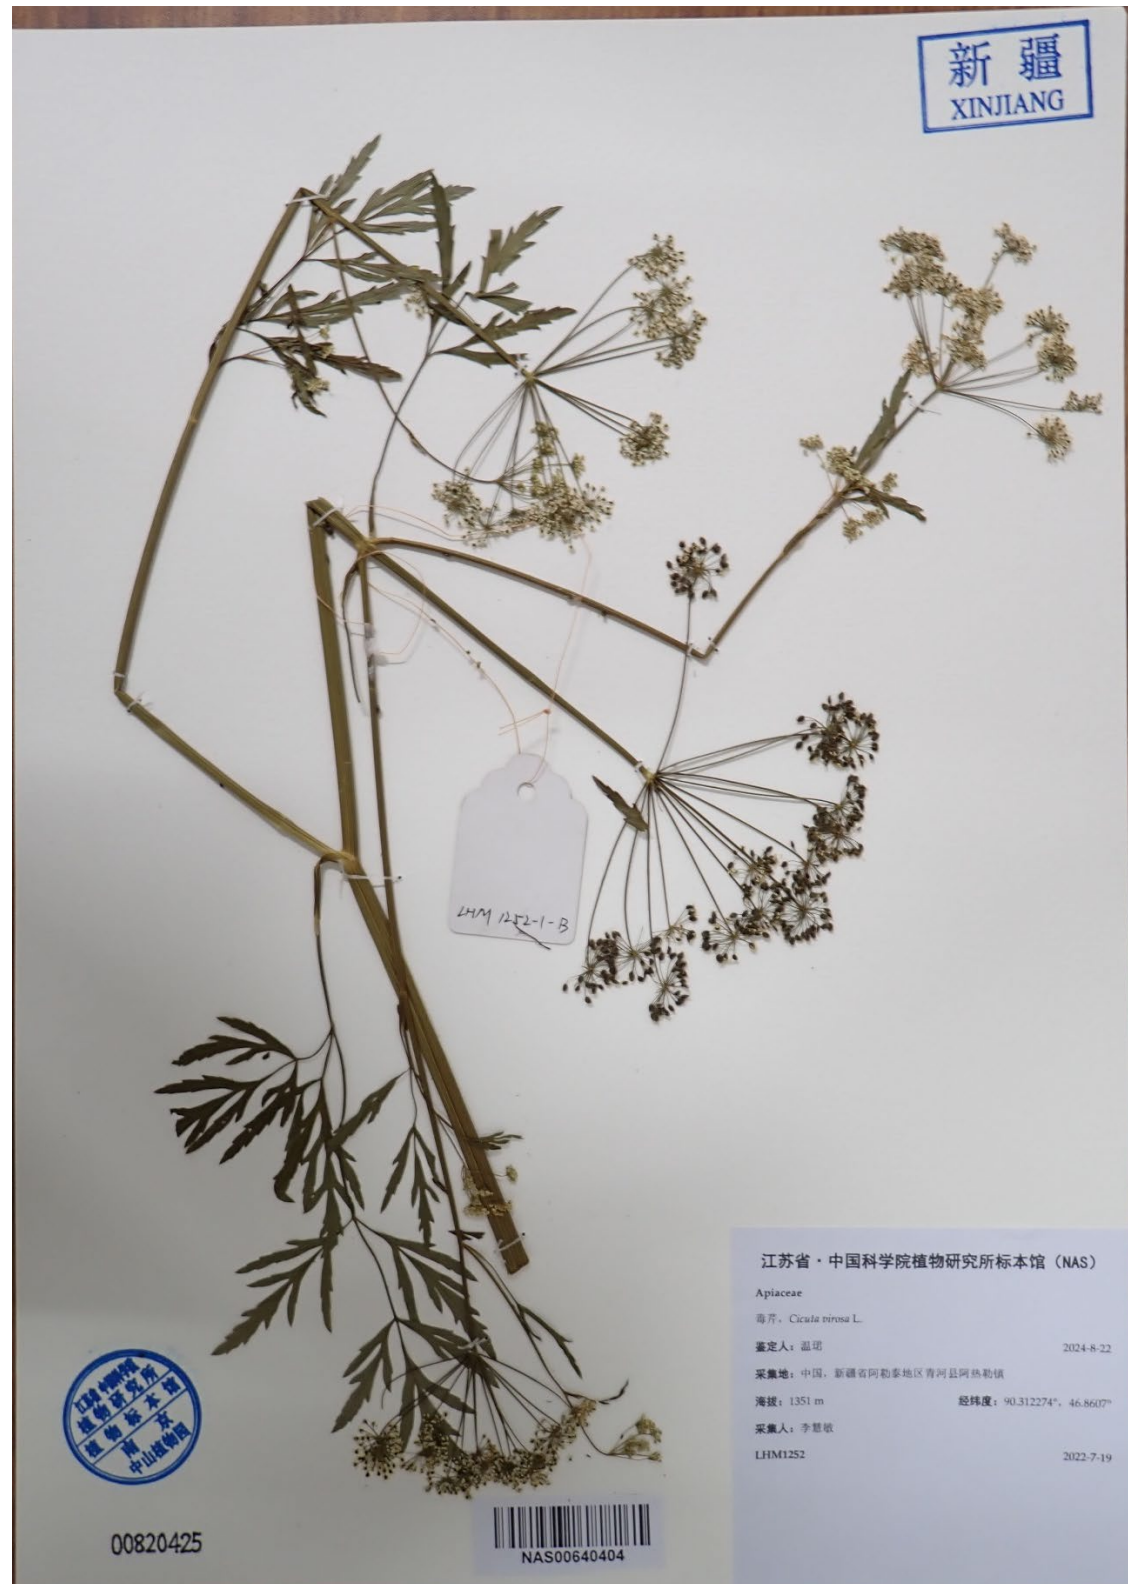

2. NAS00640405: *Cicuta virosa* WJ2368

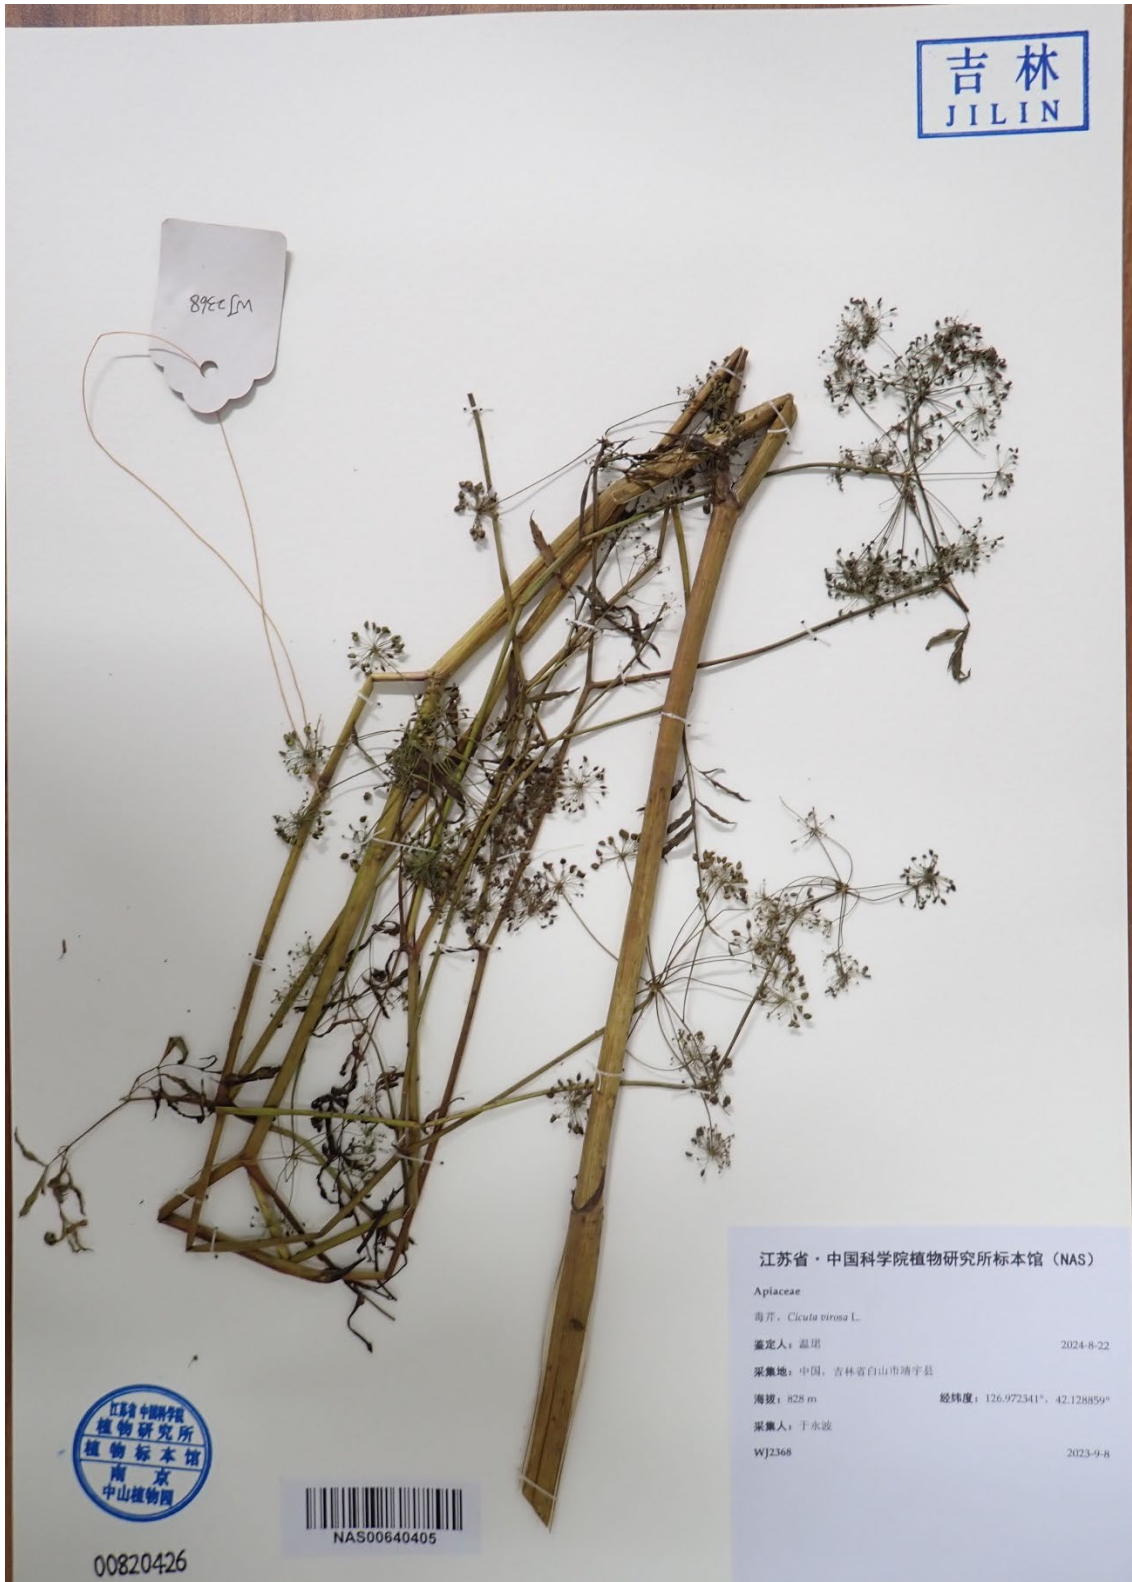



3. NAS00640406: *Cryptotaenia canadensis*

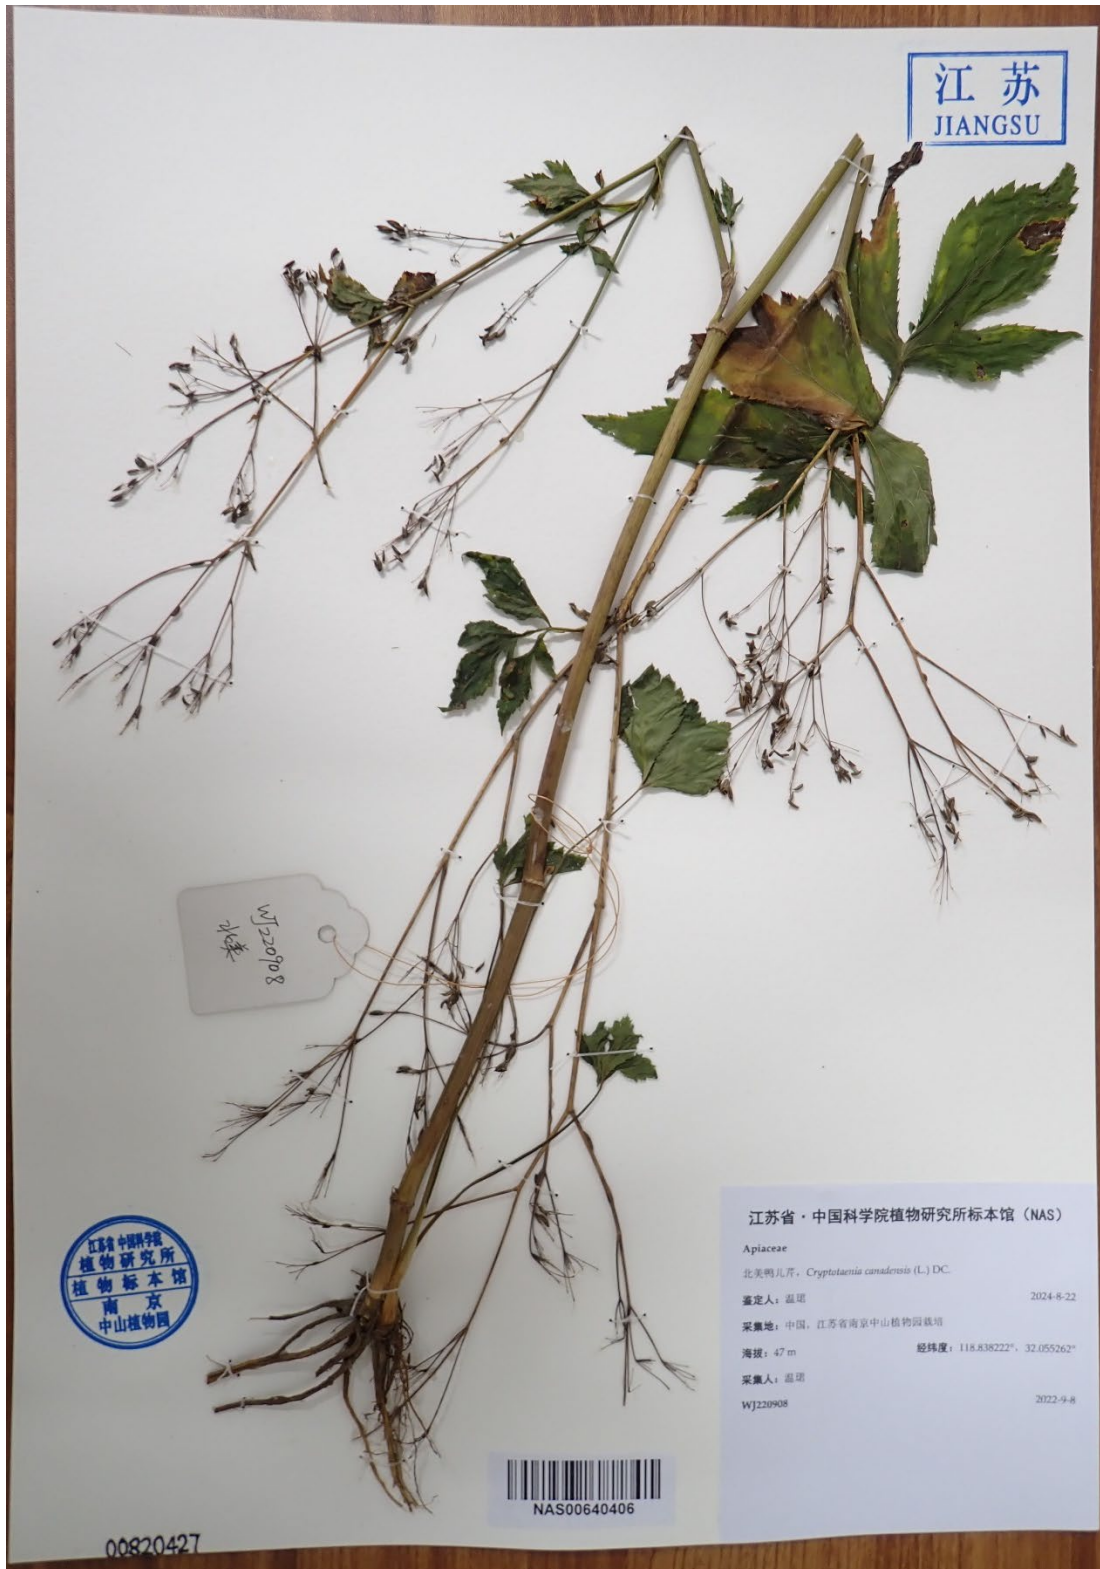

4. NAS00640407: *Cryptotaenia japonica* WJ2375

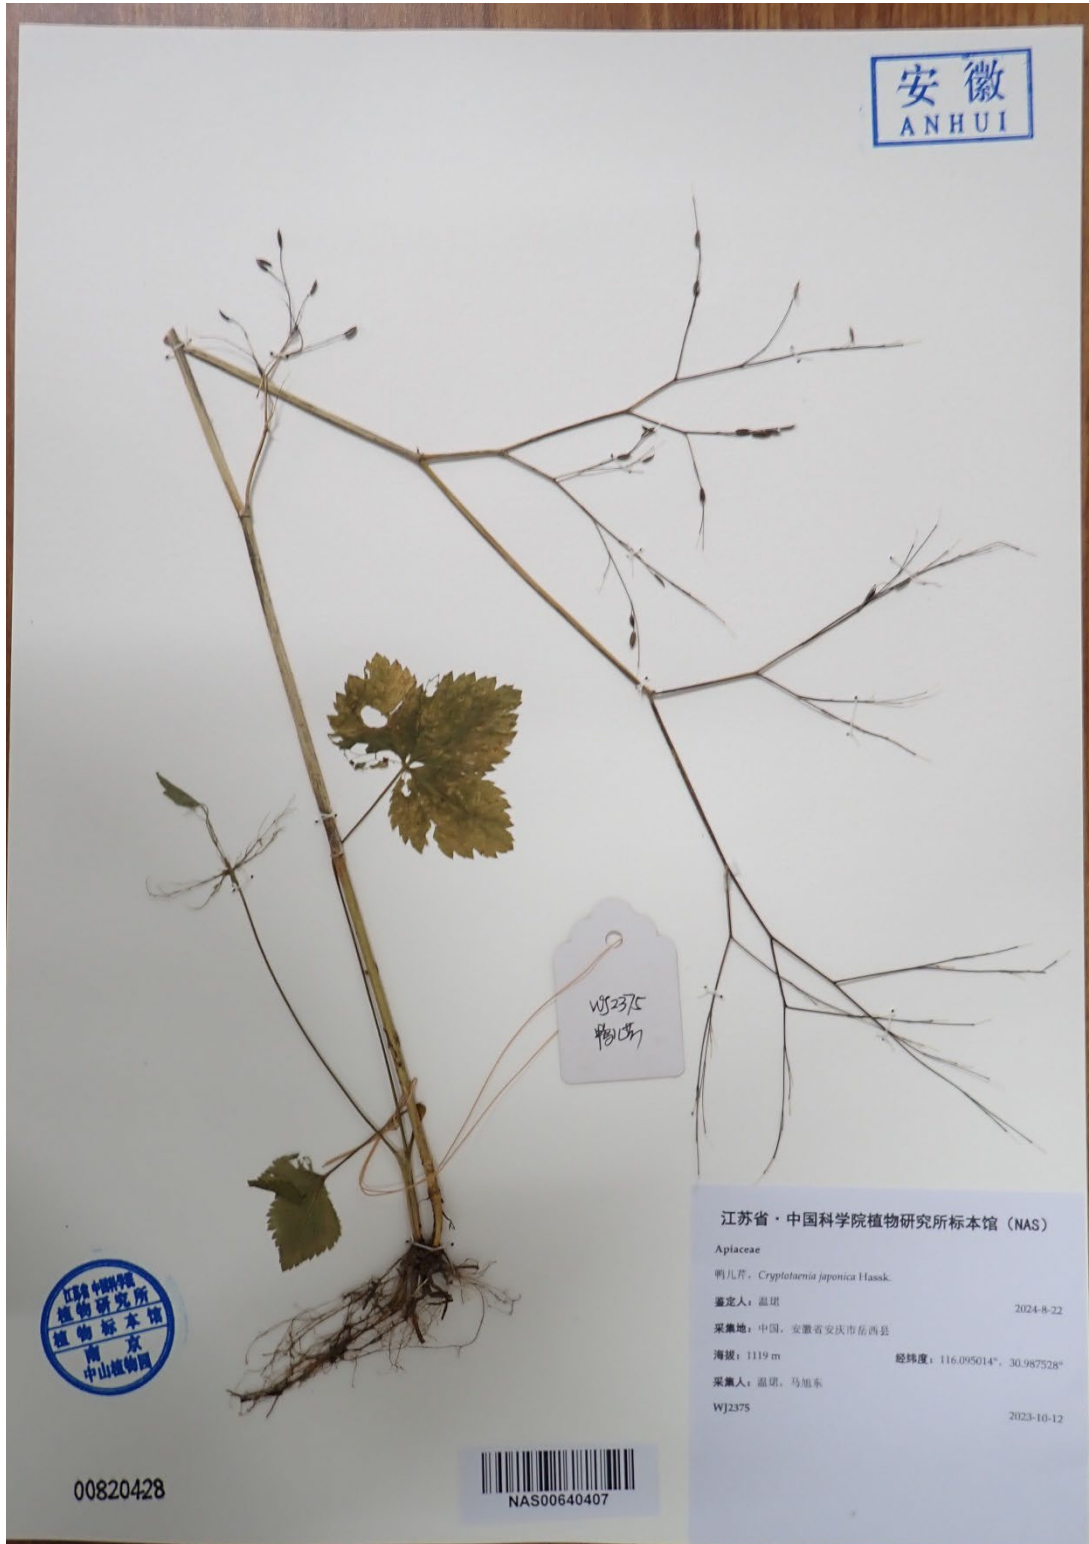

5. NAS00640408: *Cryptotaenia japonica* WJ2384

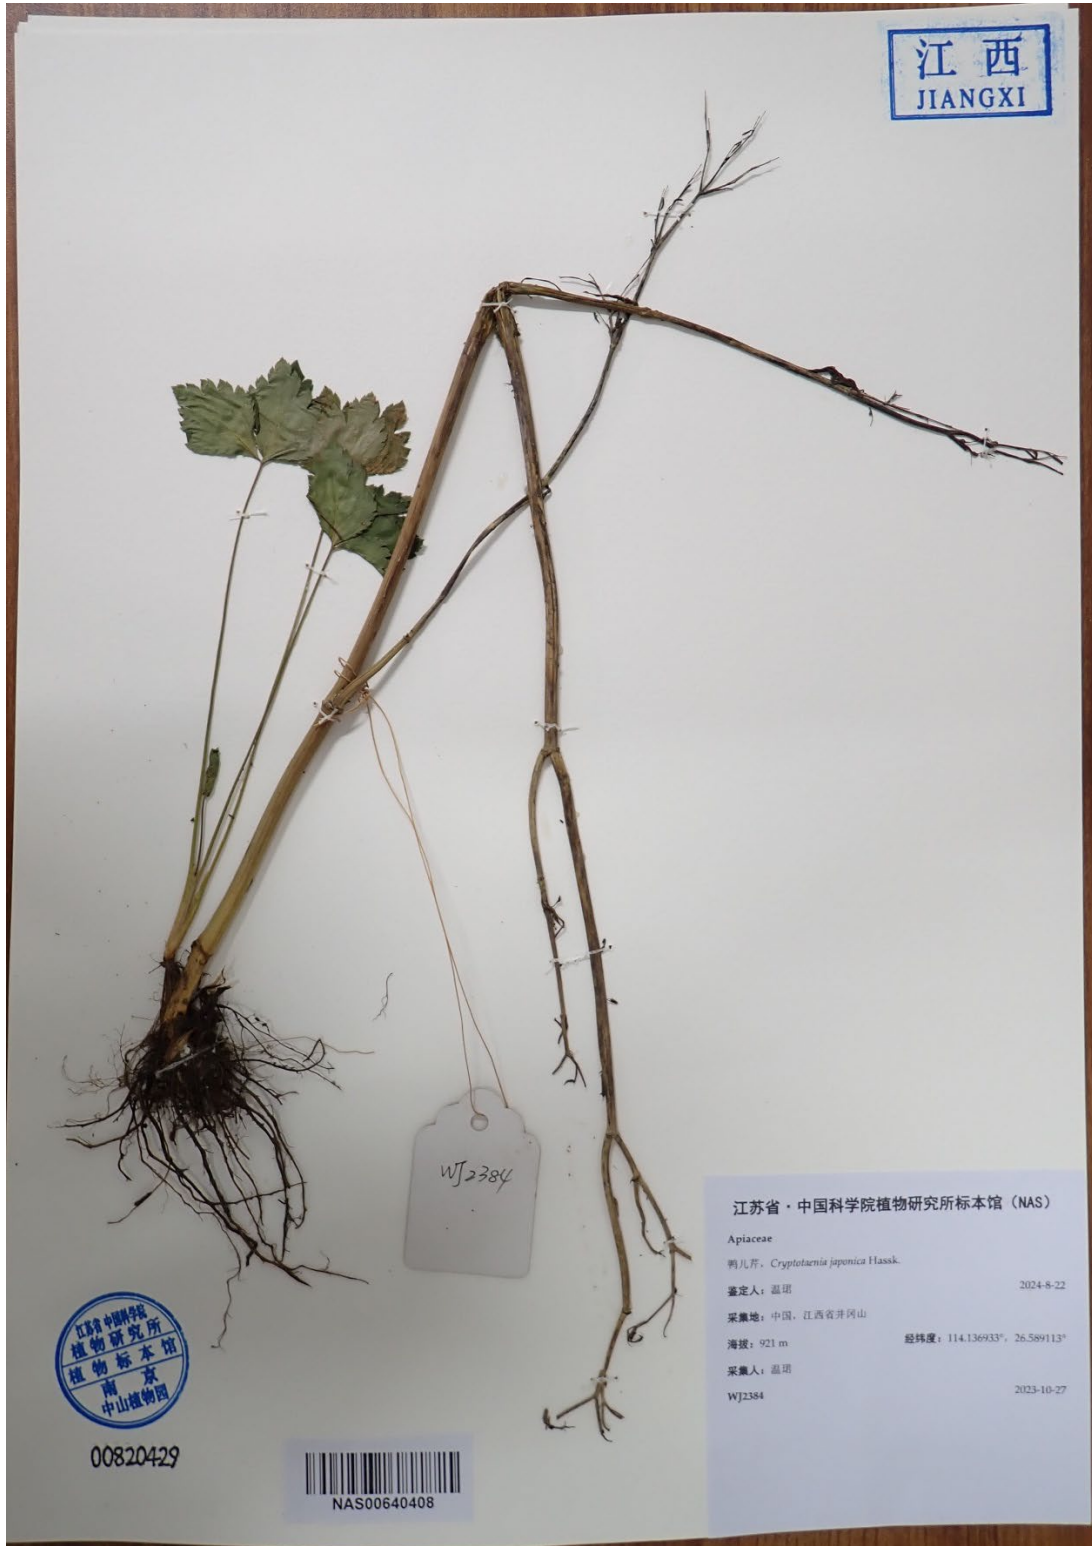

6. NAS00640409: *Oenanthe hookeri*

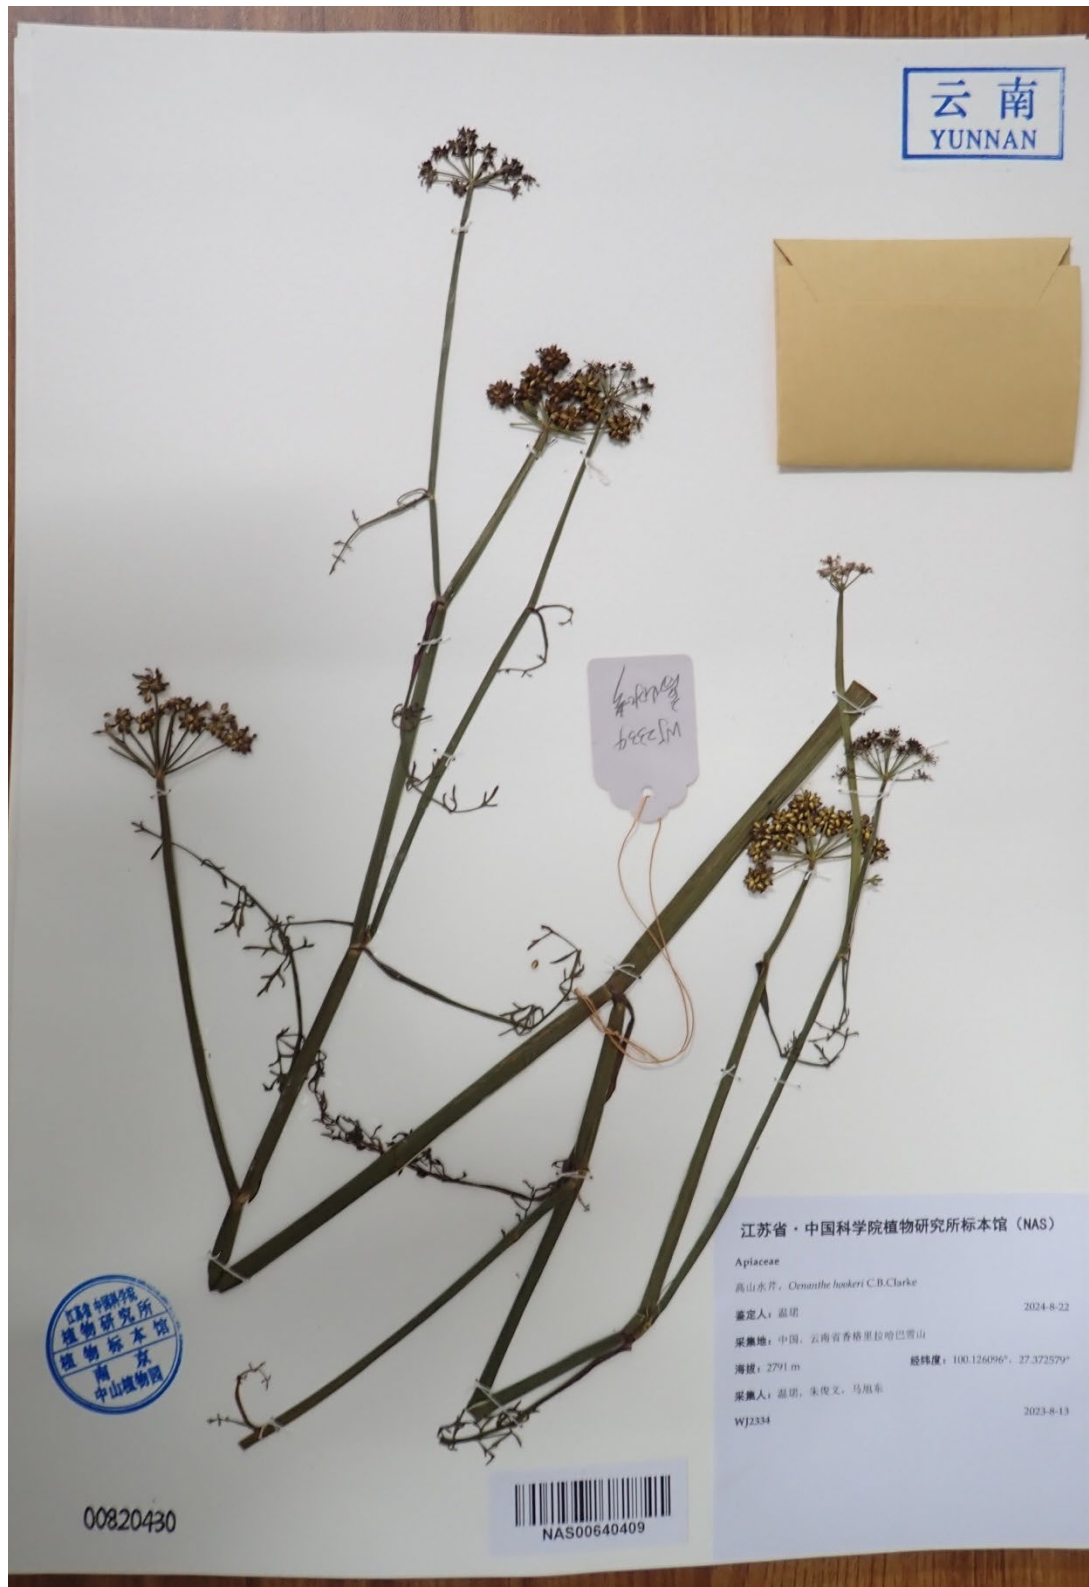

云南  
YUNNAN

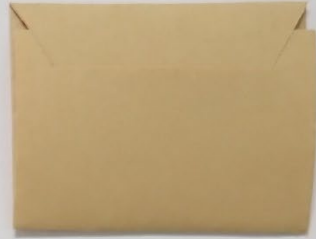

hookeri  
WJ2334

中国科学院植物研究所  
南京中山植物园

江苏省·中国科学院植物研究所标本馆 (NAS)

Apiaceae

高山水芹, *Oenanthe hookeri* C.D. Clarke

鉴定人: 高洁

2024-8-22

采集地: 中国, 云南省香格里拉巴拉巴拉山

海拔: 2791 m

经纬度: 100.126096°, 27.372579°

采集人: 高洁, 朱俊义, 马旭东

WJ2334

2023-8-13

00820430

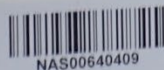

NAS00640409

7. NAS00640410: *Oenanthe javanica* WJ2305\_02

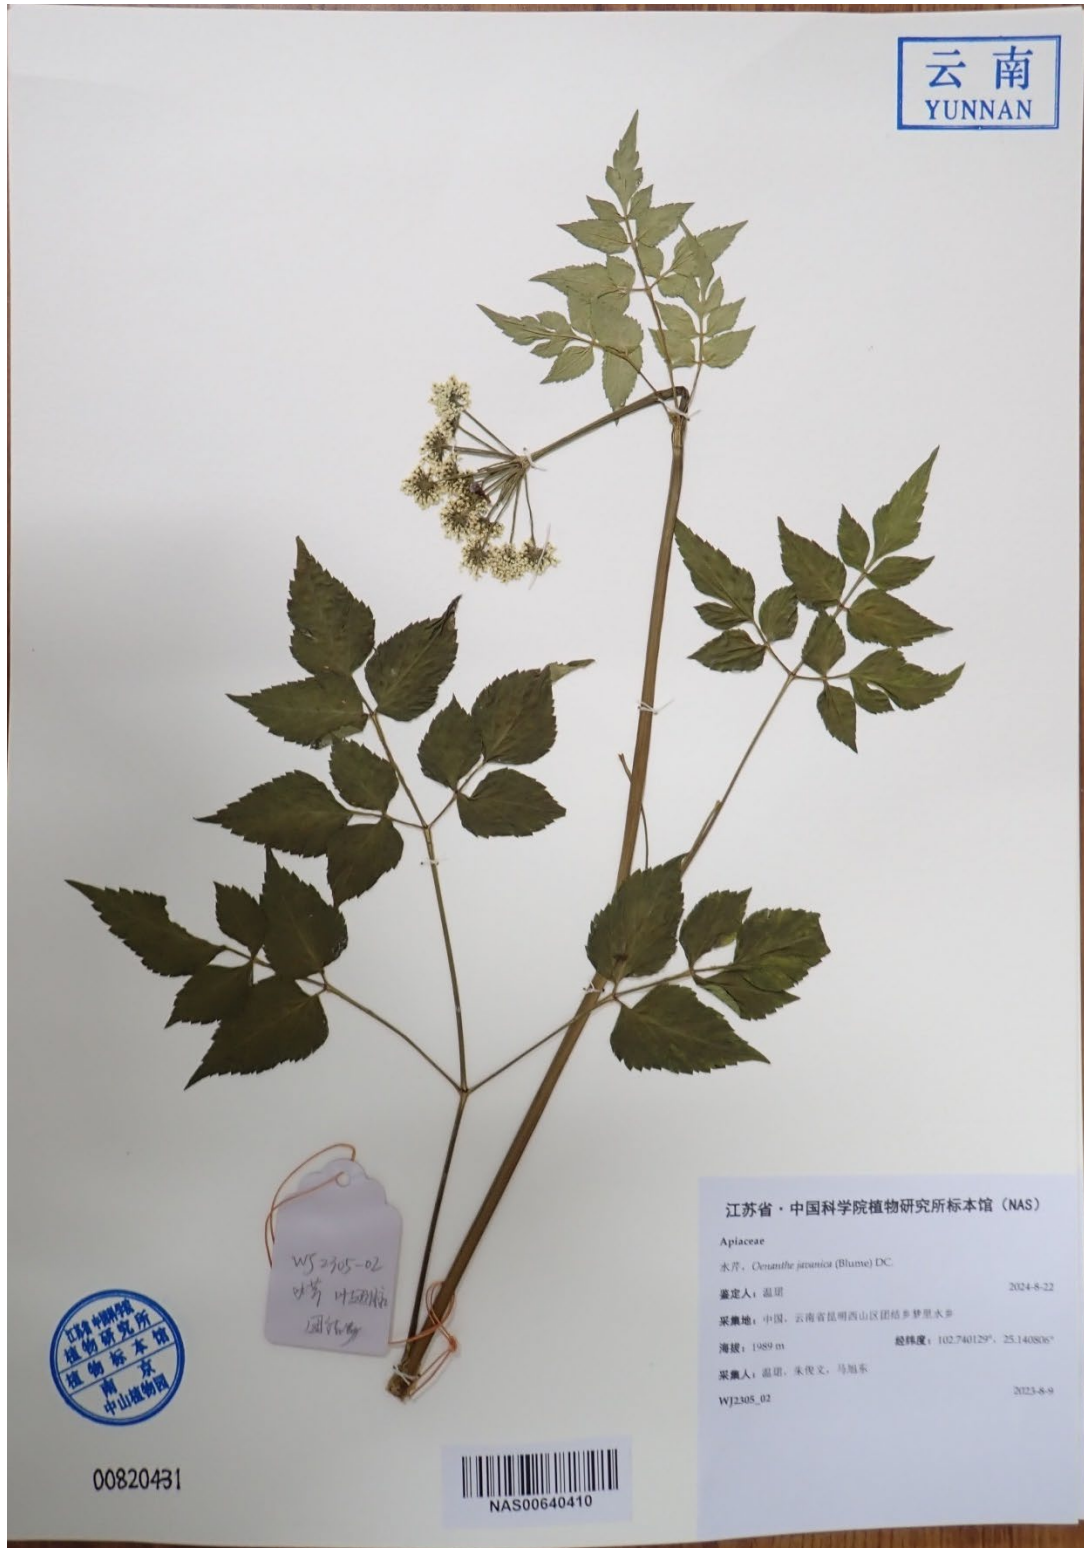

8. NAS00640411: *Oenanthe javanica* WJ2320

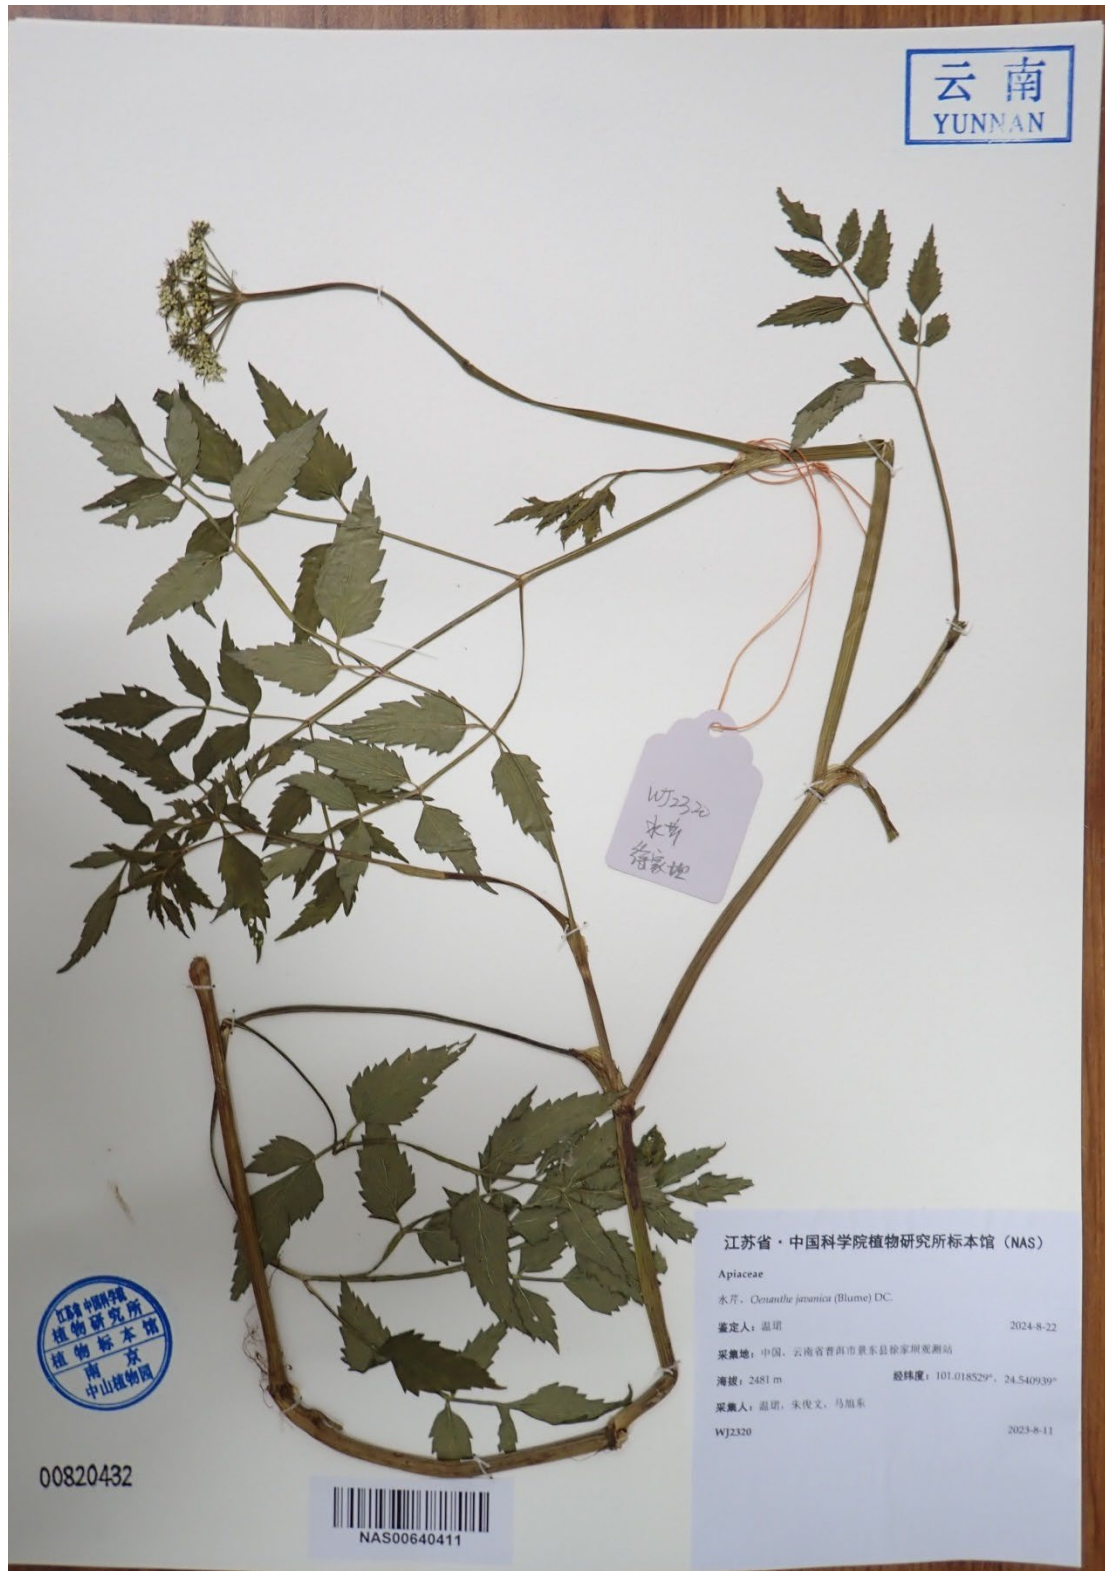

9. NAS00640412: *Oenanthe javanica* WJ2372\_AH01

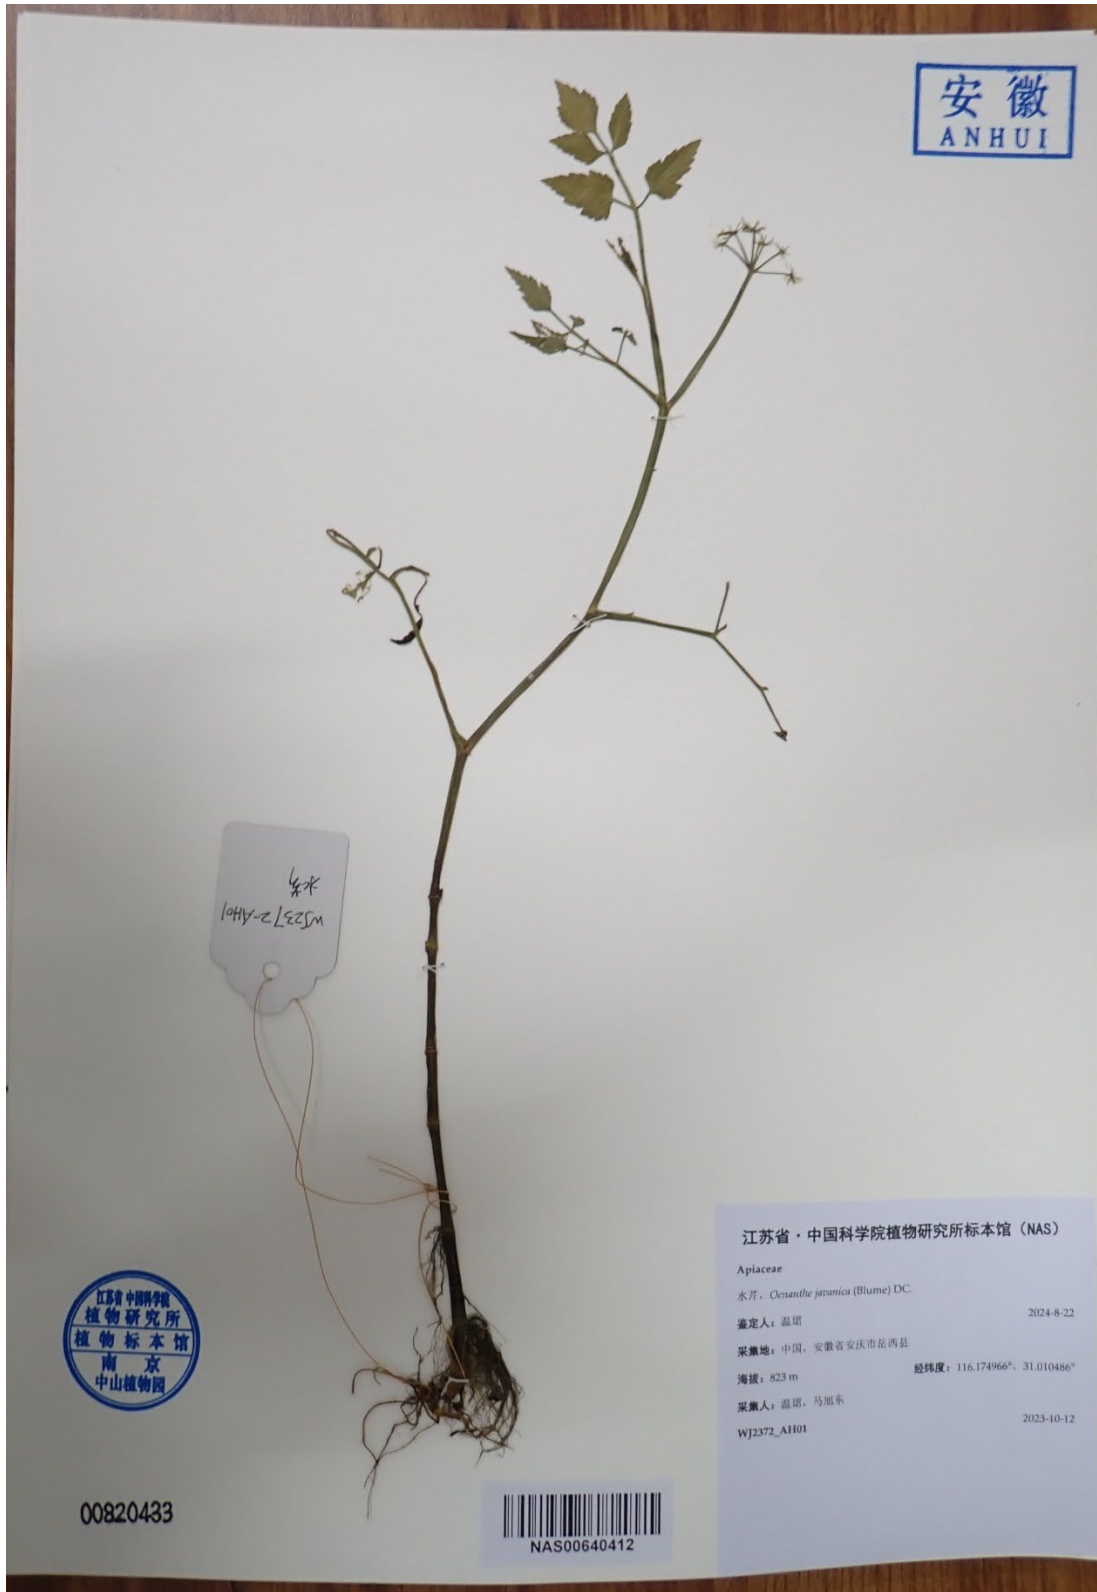

10. NAS00640413: *Oenanthe linearis* ZJW034

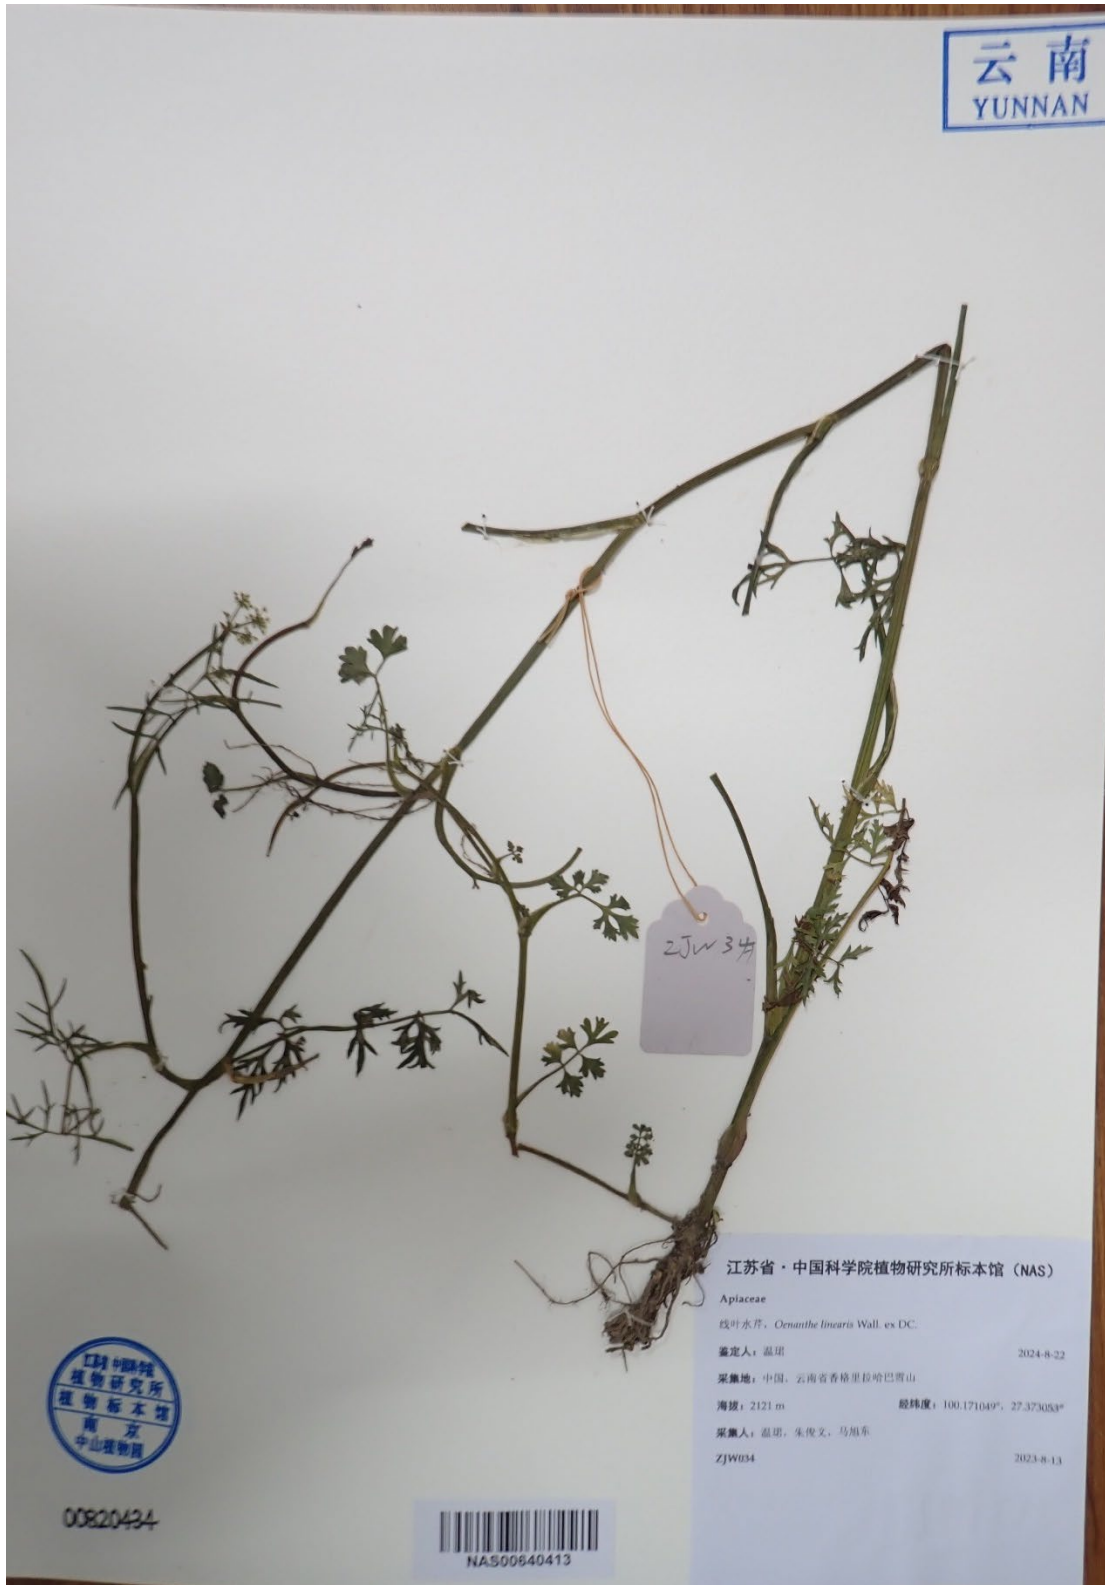

云南  
YUNNAN

ZJW 34

中国科学院  
植物研究所  
标本馆  
南京  
中山植物园

00820434

NAS00640413

江苏省·中国科学院植物研究所标本馆 (NAS)

Apiaceae  
线叶水芹, *Oenanthe linearis* Wall. ex DC.  
鉴定人: 孟琪 2024-8-22  
采集地: 中国, 云南省香格里拉巴碧山  
海拔: 2121 m 经纬度: 100.171049°, 27.373053°  
采集人: 孟琪, 朱俊义, 马旭东  
ZJW034 2023-8-13



11. NAS00640414: *Oenanthe linearis* subsp. *rivularis* NZD2301

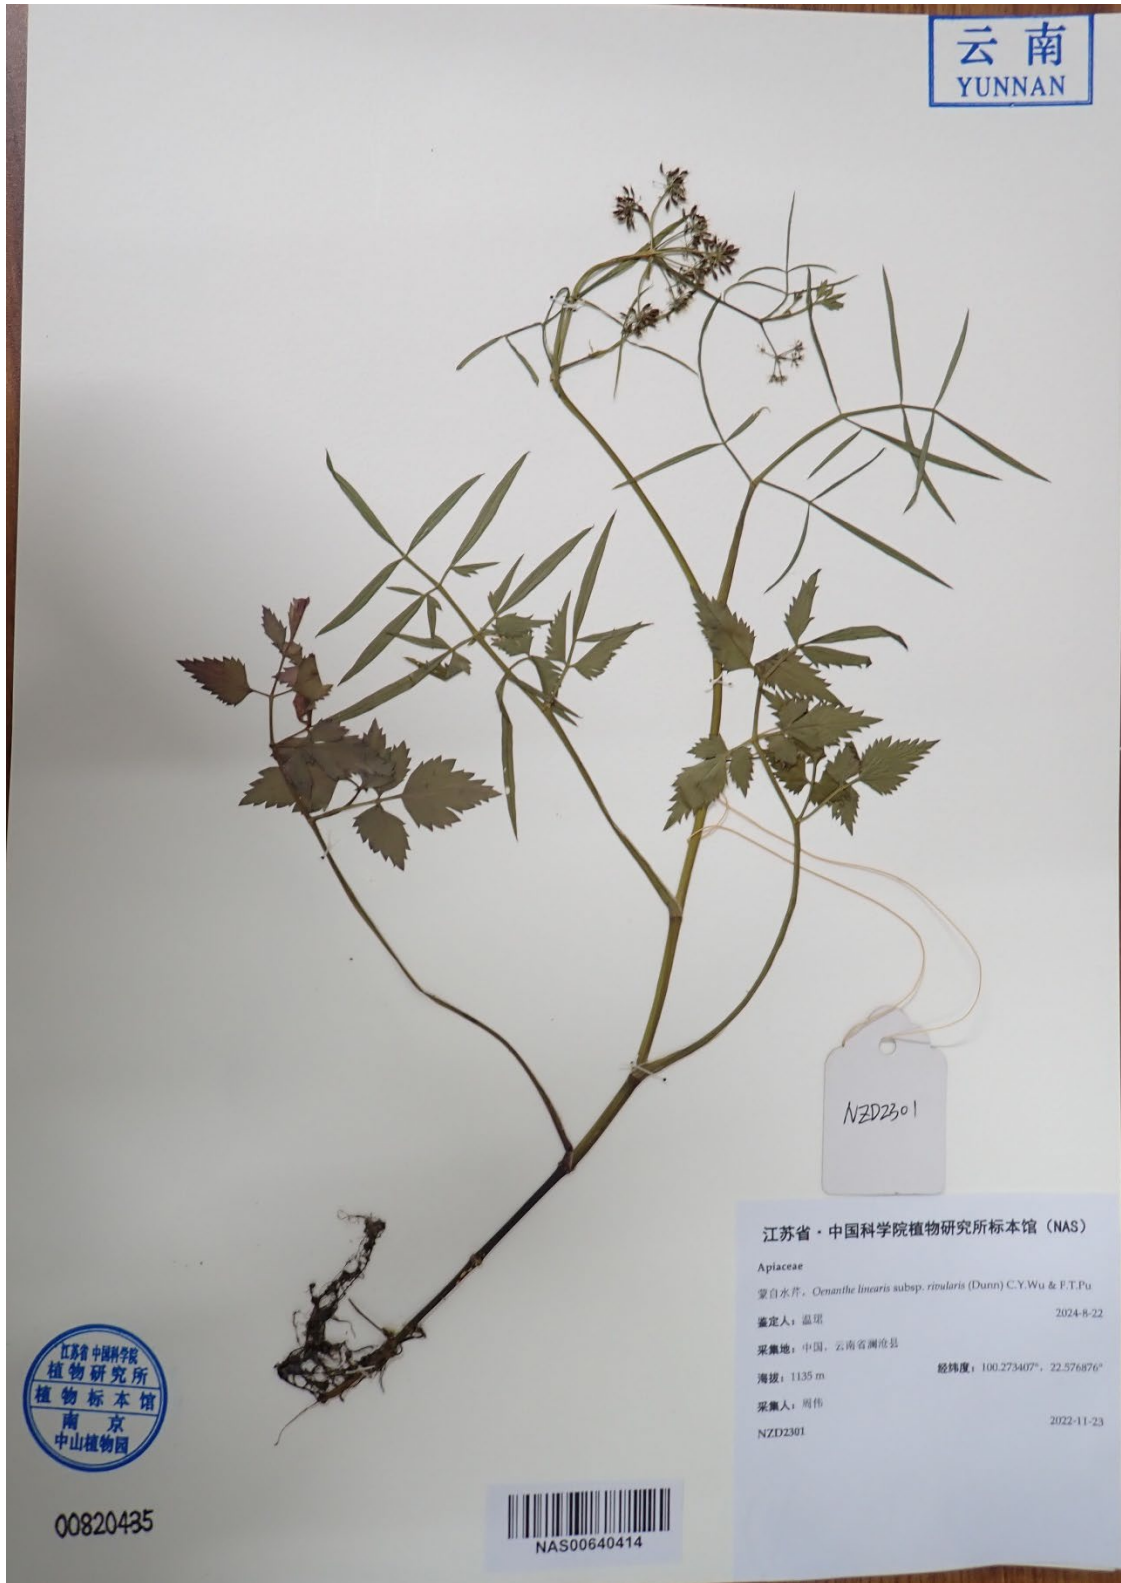

12. NAS00640415: *Oenanthe linearis* subsp. *rivularis* WJ2319

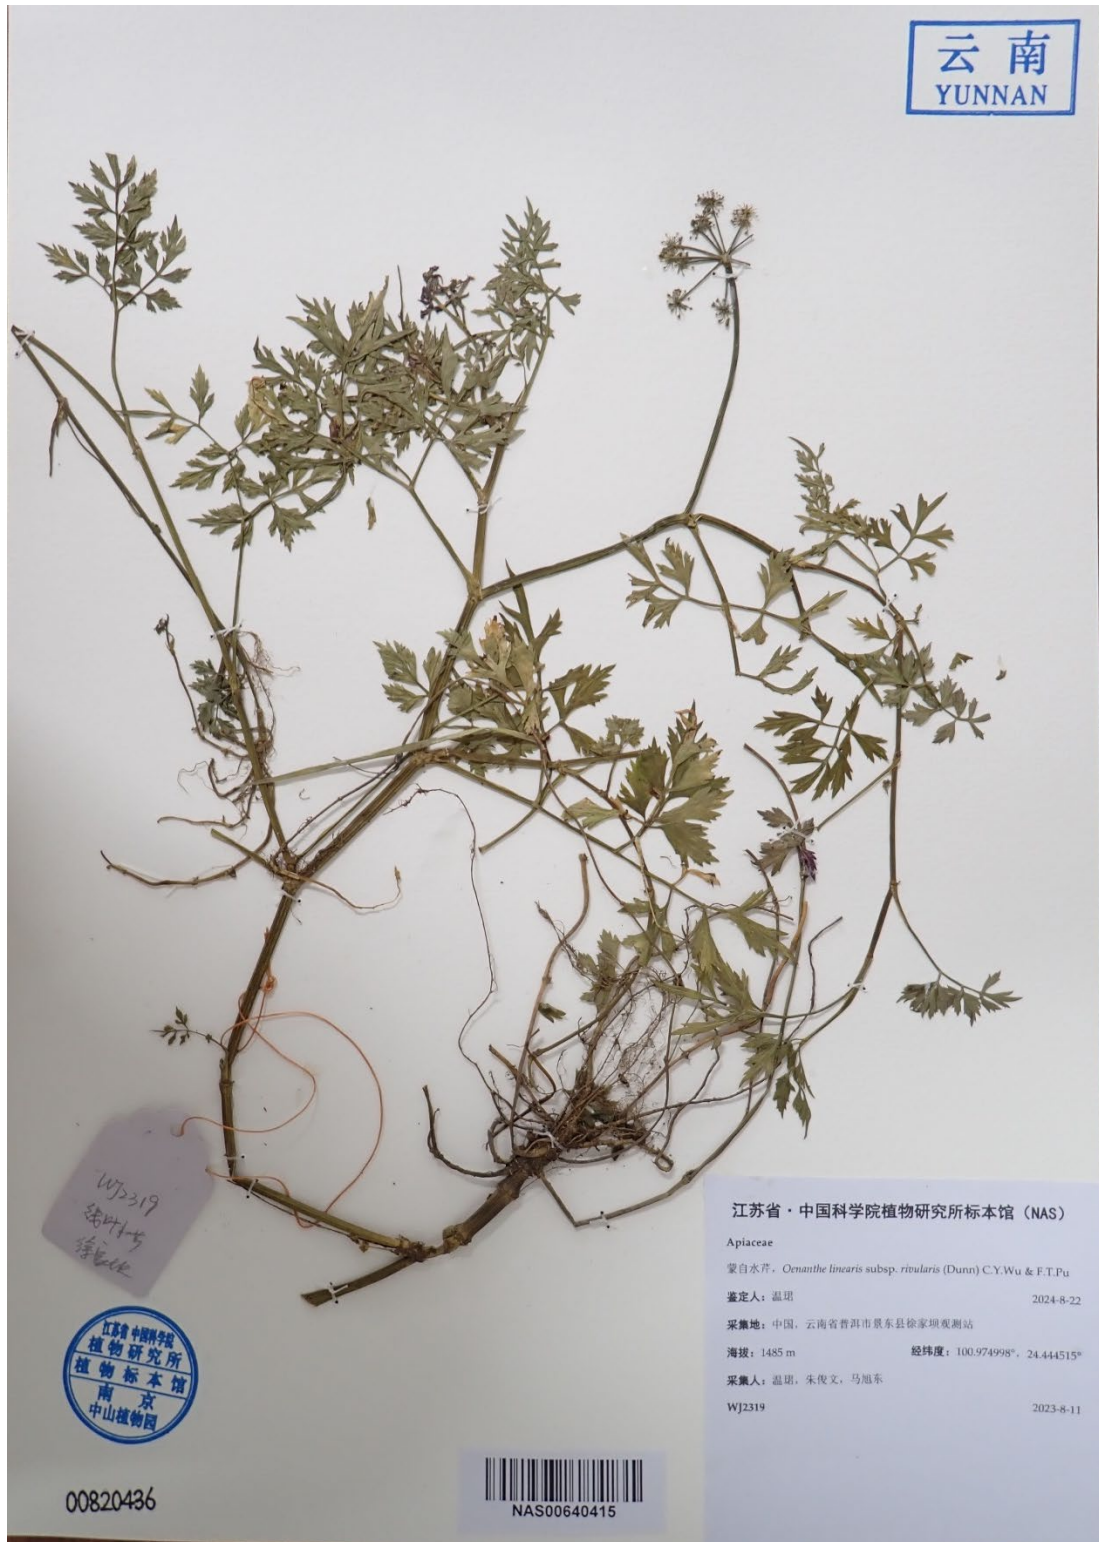

13. NAS00640416: *Oenanthe thomsonii*

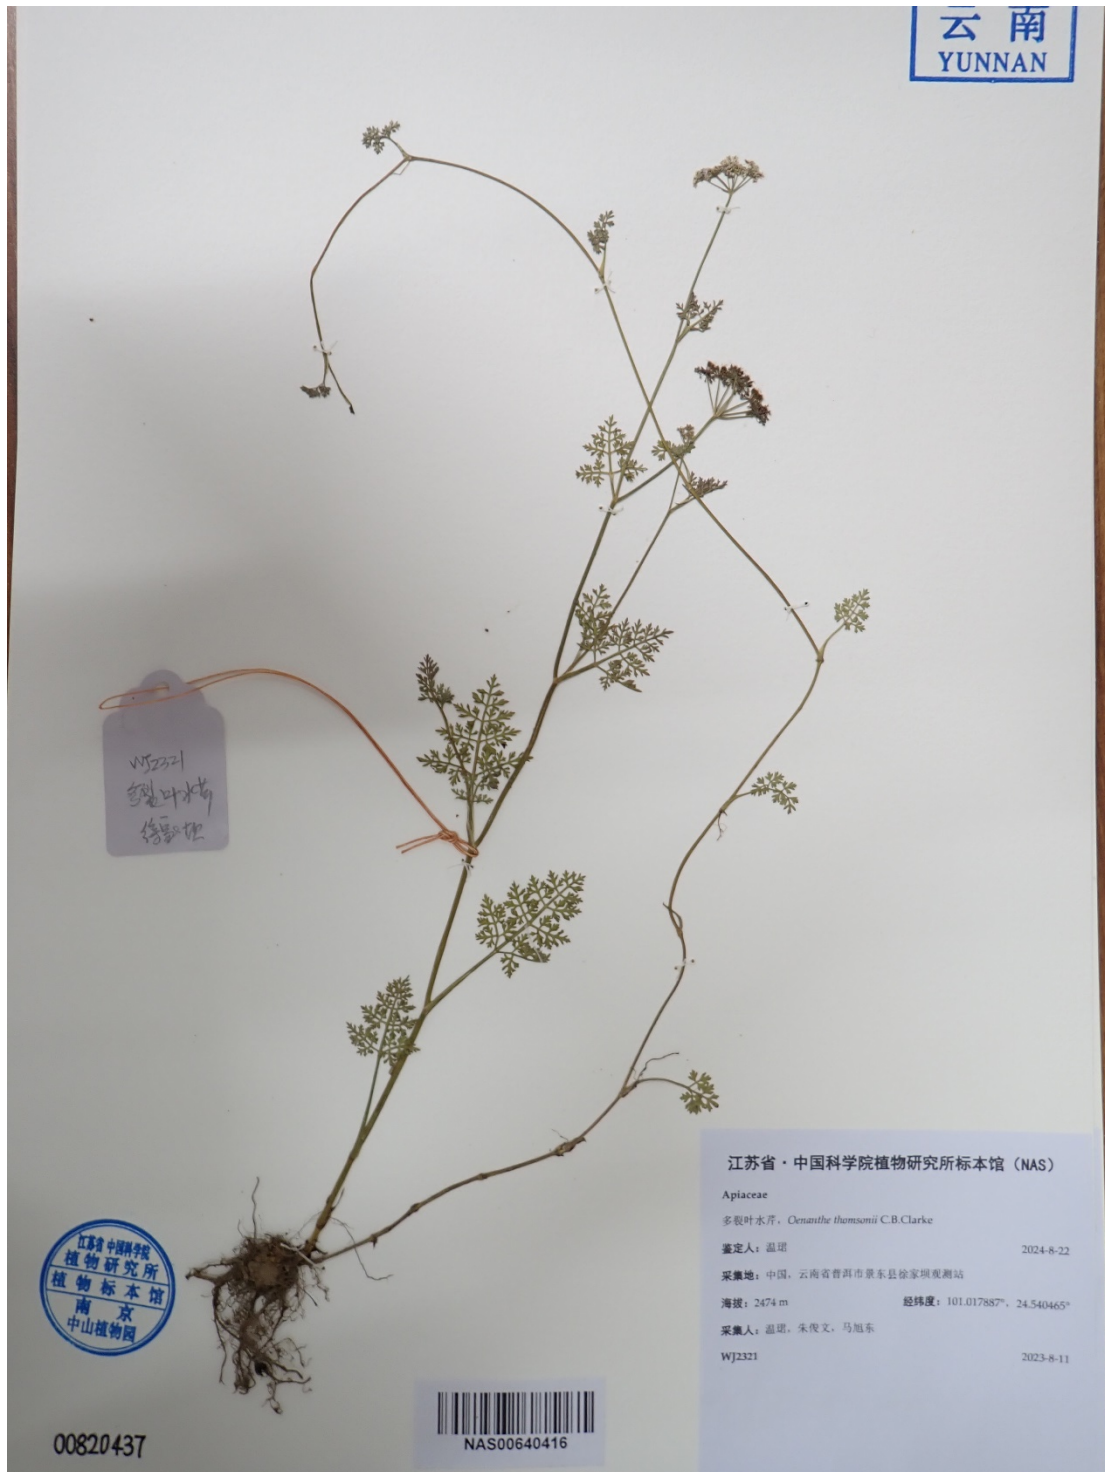

14. NAS00640417: *Oenanthe pimpinelloides*

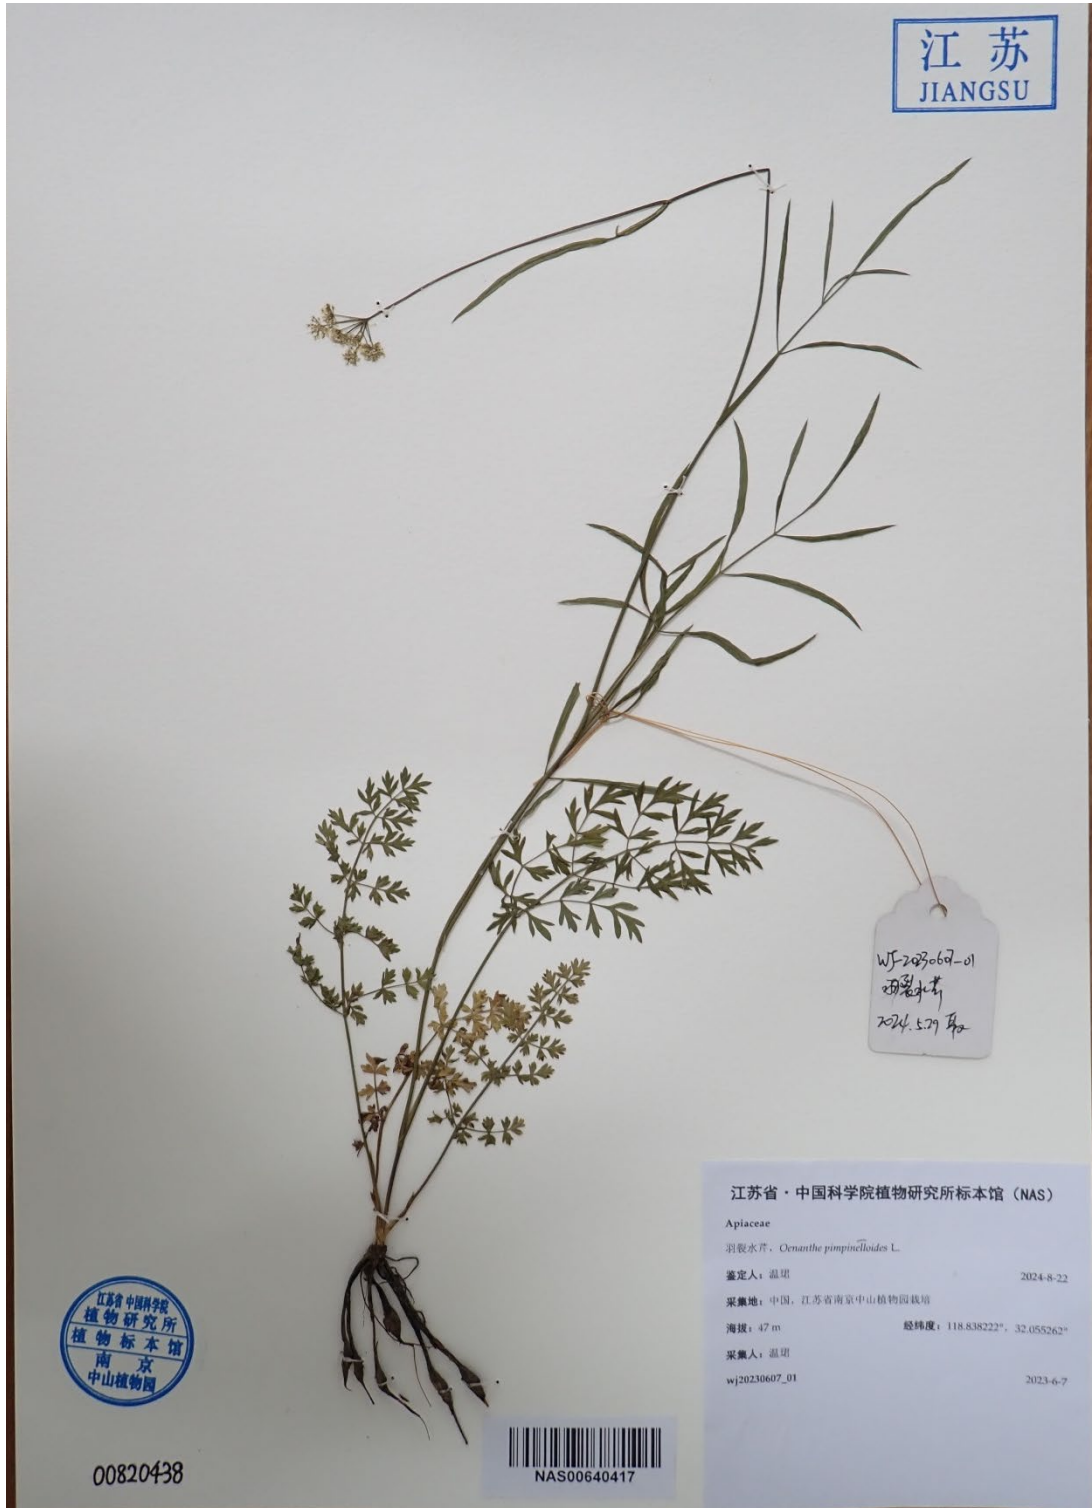

15. NAS00640418: *Sium serra*

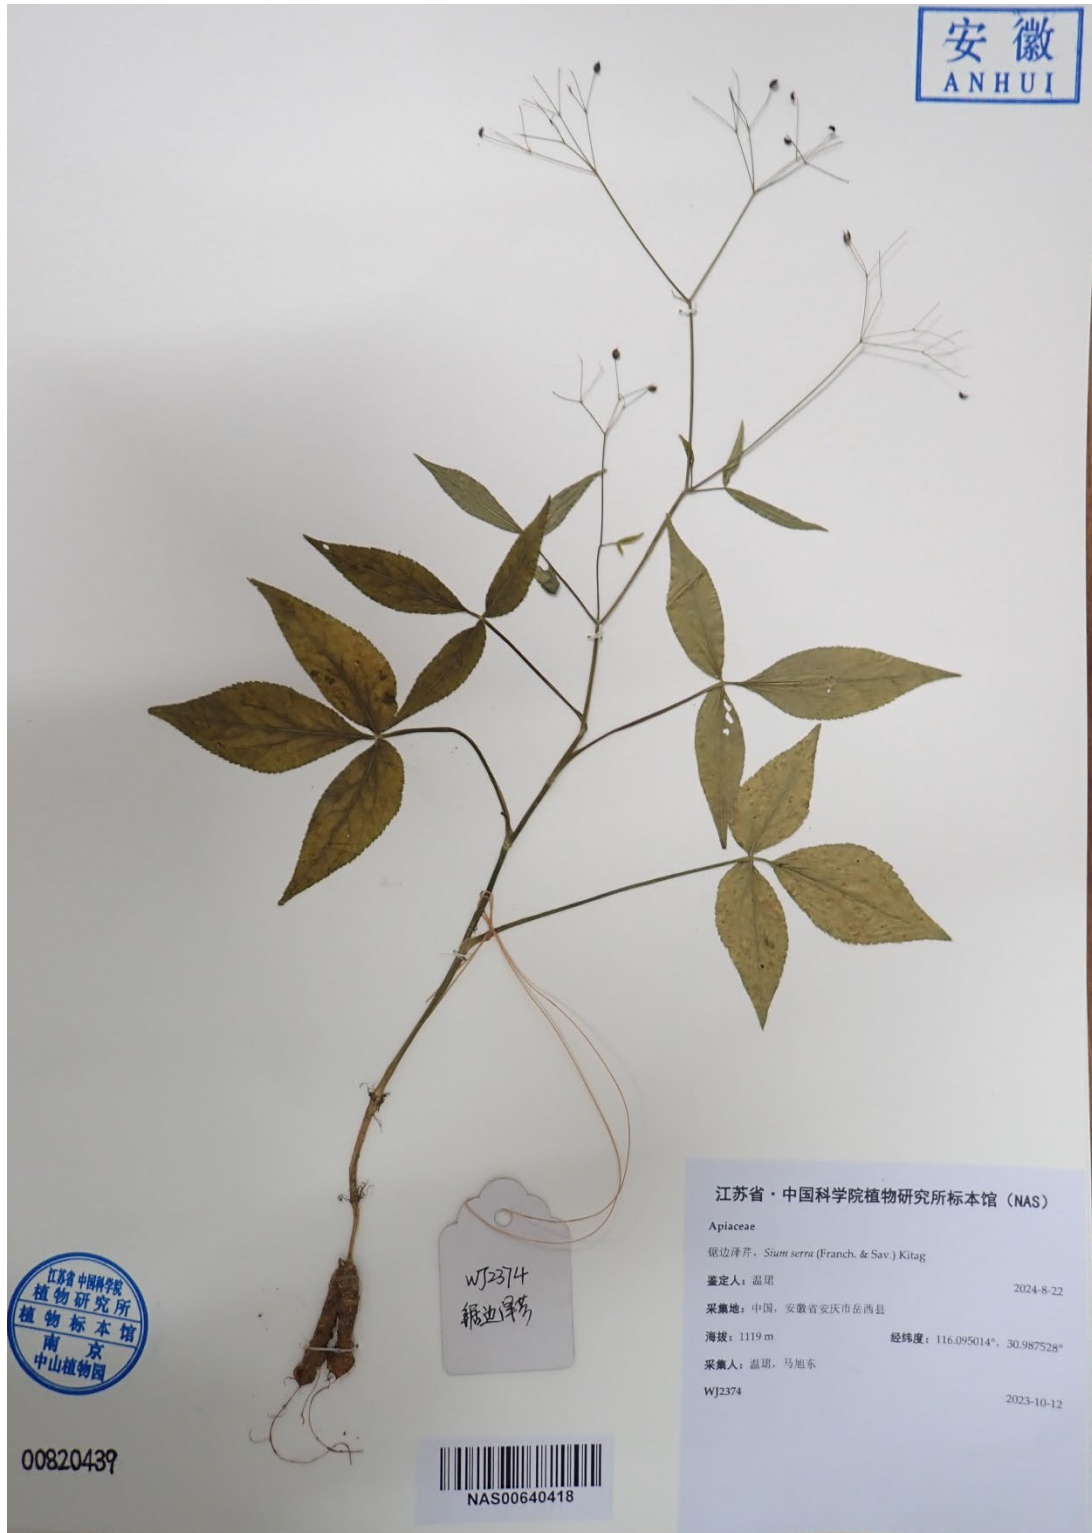

16. NAS00640419: *Sium suave*

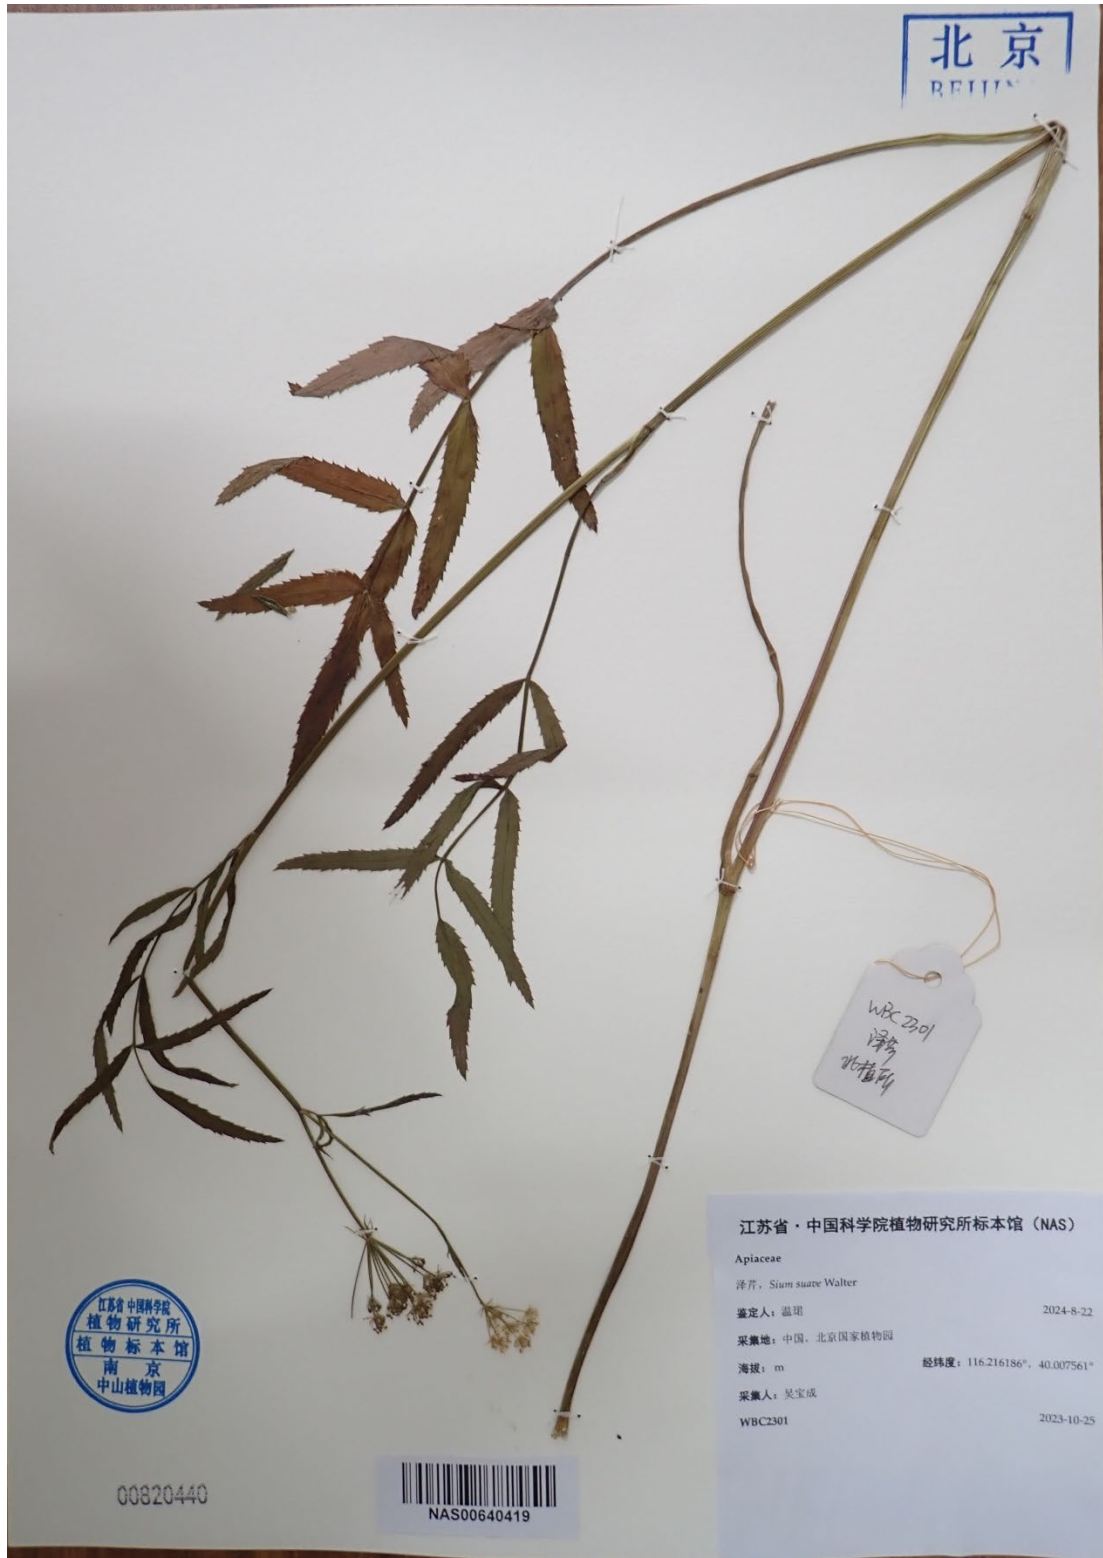

17. NAS00640420: *Sium ventricosum*

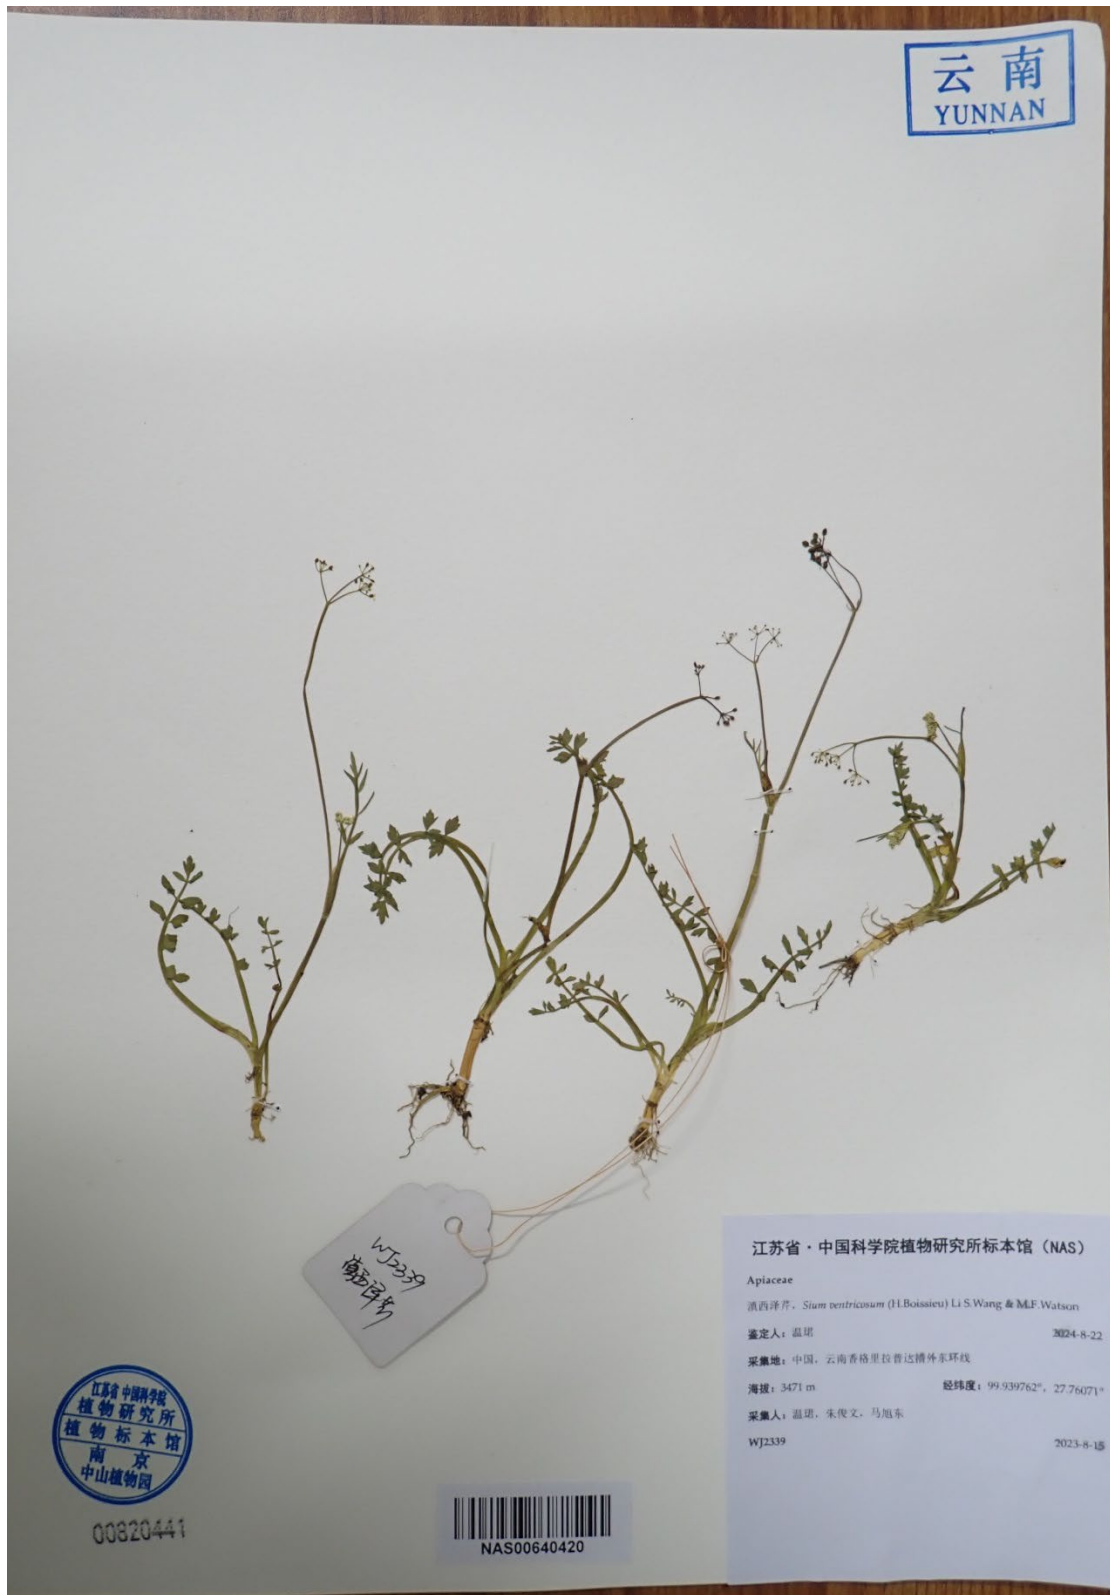

Supplement: 12870_2024_5863_MOESM3_ESM.pdf [file 12870_2024_5863_MOESM3_ESM.pdf]
